# Supplementary material for: A systematic safety pipeline for selection of T-cell receptors to enter clinical use
Source: PubMed Central journal article supplement (PMC10444760; doi:10.1038/s41541-023-00713-y), 2023-08-22
Supplement: 41541_2023_713_MOESM1_ESM.pdf [file 41541_2023_713_MOESM1_ESM.pdf]

Leader sequence

CDR3s

Murine constant domain with Cysteine substitution C  
ribosomal skipping sequence P2A

1G4 TCR aa sequence

MSIGLLCCAALSLLWAGPVNAGVTQTPKFQVLKTGQSMTLQCAQDMNHEYMSWYRQDPGMGLRLIHYSVGAG  
ITDQGEVPNGYNVSRSTTEDFPLRLLSAAPSQTSVYFCASSYVGNTEGELFFGEGSRLTVLEDLRNVTPPKVSLFEPK  
AEIANKQKATLVCLARGFFPDHVELSWVWNGKEVHSGVCTDPQAYKESNYSYCLSSRLRVSATFWHNPRNHFR  
CQVQFHGLSEEDKWPEGSPKPVTVQNISAEAWGRADCGITSASYHQGVLSATILYEILLGKATLYAVLVSGLVLMAM  
MVKKKNSGSGATNFSLLKQAGDVEENPGPMKSLRVLLVILWLQLSWVWSQKQEVTVIPAALSVPEGENLVLNCS  
FTDSAIYNLQWFRQDPGKGLTSLLIQSSQREQTSGRLNASLDKSSGRSTLYIAASQPGDSATYLCAVRPLYGGSYIP  
TFGRGTLIVHPDIQNPEPAVYQLKDPQRSQDSTLCLFTDFDSQINVPKTMESGTFITDKCVLDMKAMD SKSNGAI  
AWSNQTSTFCQDIFKETNATYPSSDVPCDATLTEKSFETDMNLNFQNL SVMGLRILLKLVAGFNLLMTLRLWSS

A23 TCR aa sequence

MSNQVLCCVVLCLLGANTVDGGITQSPKYLFRKEGQNVTLSCQNLNHDAMYWYRQDPGQGLRLIYYSQIVNDF  
QKGDIAEGYSVSREKKESFPLTVTSAQKNPTAFYLCATAPGLSYEQYFGPGTRLTVTEDLRNVTPPKVSLFEPKAEI  
ANKQKATLVCLARGFFPDHVELSWVWNGKEVHSGVCTDPQAYKESNYSYCLSSRLRVSATFWHNPRNHFRQC  
VQFHGLSEEDKWPEGSPKPVTVQNISAEAWGRADCGITSASYHQGVLSATILYEILLGKATLYAVLVSGLVLMAM  
VKKKNSGSGATNFSLLKQAGDVEENPGPMKSLRVLLVILWLQLSWVWSQQPVQSPQAVILREGEDAVINCSSSK  
ALYSVHWYRQKHGEAPVFLMILLKGGEQKGDHDI SASFNEKKQSSLYLTASQLSYSGTYFCGTQGGSEKLVFGKG  
TKLTVNPDIQNPEPAVYQLKDPQRSQDSTLCLFTDFDSQINVPKTMESGTFITDKCVLDMKAMD SKSNGAIAWSN  
QTSFTCQDIFKETNATYPSSDVPCDATLTEKSFETDMNLNFQNL SVMGLRILLKLVAGFNLLMTLRLWSS

Supplementary Figure 1. Amino Acid sequences of the 1G4 and A23 TCRs

Colour coding denotes Leader sequence, CDR3s, Murine constant domain with Cysteine substitution C,  
and ribosomal skipping sequence P2A



**Supplementary Figure 2. 1G4 TCR-T activation in response to positional scanning peptide matrix and length variants of the cognate peptide**

**(A)** Gating strategy for assessment of the percentage of transduced CD8<sup>+</sup> T cells expressing the activation marker CD137. Effector cells were identified as live single cells staining positively with CD8 and anti-mouse TCR $\beta$ .

**(B)** 1G4 TCR-Ts were incubated with HLA-A2<sup>+</sup> B-LCL cells loaded with a library of 9-mer peptides containing single amino acid exchanges compared to the original SLL peptide. Cells from 24 h co-cultures were analysed for CD137 upregulation by flow cytometry. The heat map shows the mean of three independent experiments. Column/row intersections indicate the replaced amino acid at a given position and white circles indicate the original peptide sequence. Substitutions are divided by physicochemical properties: SMA: small; POL: polar; AC: acidic; ARO: aromatic; BAS: basic; ALIF: aliphatic.

**(C)** Correlation analysis of the percentage of cells expressing CD137 (shown in Supplementary Figure 1A) with IFN- $\gamma$  release (shown in Figure 1A).  $r$  = Pearson correlation coefficient.

**(D)** Correlation analysis of the percentage of cells expressing CD137 (shown in Supplementary Figure 1A) with activation marker upregulation published by Karapetyan et al.<sup>28</sup>.  $r$  = Pearson correlation coefficient.

**(E)** 1G4 TCR-Ts were incubated with HLA-A2<sup>+</sup> B-LCL cells loaded with peptides that are upstream or downstream of the original epitope, or longer peptides containing the SLF sequence at a 10<sup>-7</sup> M concentration. Supernatants of 24 h co-cultures were analyzed for IFN- $\gamma$  content by ELISA. The graphs show pooled data from 3 independent experiments with three technical replicates in each. Dots represent means of technical replicates. Values are normalized to IFN- $\gamma$  production induced by the original target peptide (range 9,900 – 12,500pg/ml).

CDR3s, Murine constant domain with Cysteine substitution C, and ribosomal skipping sequence P2A

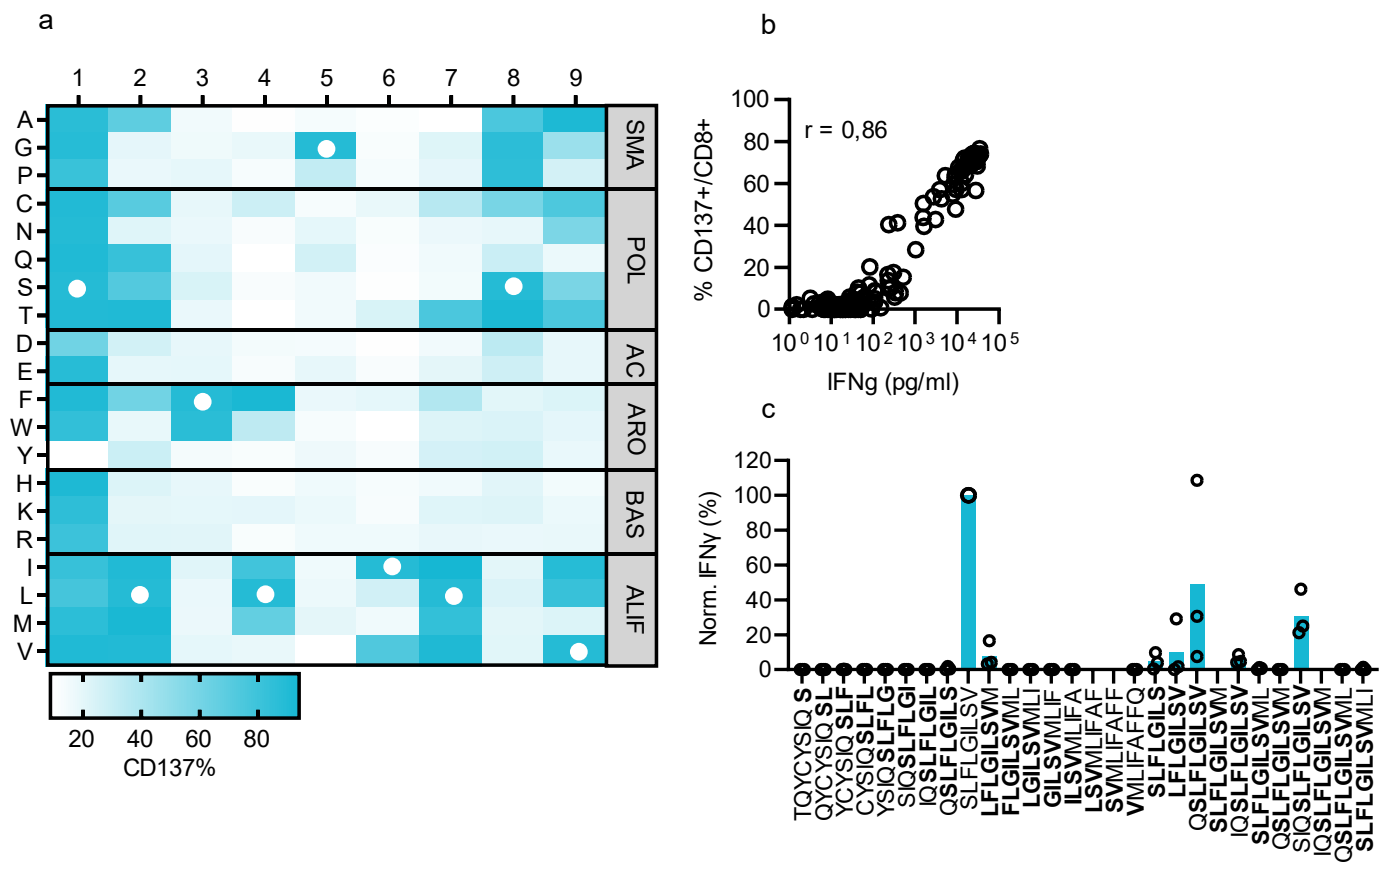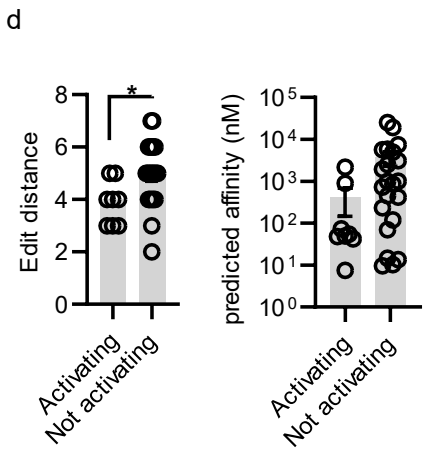

**Supplementary Figure 3. A23 TCR-T activation in response to positional scanning peptide matrix and length variants of the cognate peptide**

**(A)** A23 TCR-Ts were incubated with HLA-A2<sup>+</sup> K562 cells loaded with a library of 9-mer peptides containing single amino acid exchanges compared to the original SLF peptide. Cells from 24 h co-cultures were analysed for CD137 upregulation by flow cytometry. The heat map shows the mean of three independent experiments. Column/row intersections indicate the replaced amino acid at a given position and white circles indicate the original peptide sequence. Substitutions are divided by physicochemical properties: SMA: small; POL: polar; AC: acidic; ARO: aromatic; BAS: basic; ALIF: aliphatic.

**(B)** Correlation analysis of the percentage of cells expressing CD137 (shown in Supplementary Figure 2A) with IFN- $\gamma$  release (shown in Figure 1D).  $r$  = Pearson correlation coefficient.

**(C)** A23 TCR-Ts were incubated with HLA-A2<sup>+</sup> K562 cells loaded with peptides that are upstream or downstream of the original epitope, or longer peptides containing the SLF sequence, at  $10^{-7}$  M concentration. Supernatants of 24 h co-cultures were analysed for IFN- $\gamma$  content by ELISA. The graphs show pooled data from 3 independent experiments with three technical replicates in each. Dots represent means of technical replicates. Values are normalized to IFN- $\gamma$  production induced by the original target peptide (range 25,000 – 40,000pg/ml).

**(D)** Edit distances (left) and predicted binding affinities to HLA-A2 (right), for of A23-activating and non-activating peptides. P-values were determined using Student's t-test. Dots represent individual peptides with error bars showing mean  $\pm$  SD.

Supplementary Figure 4

a

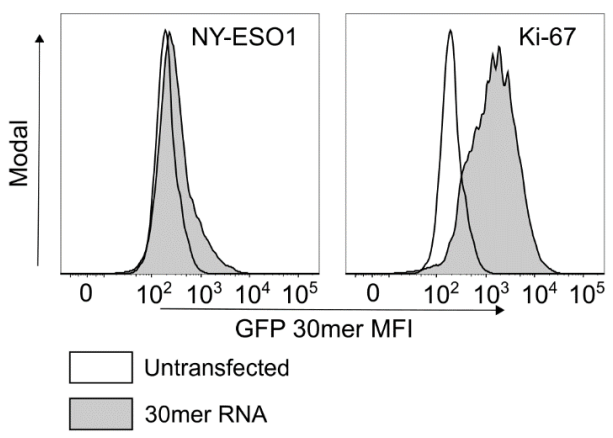

b

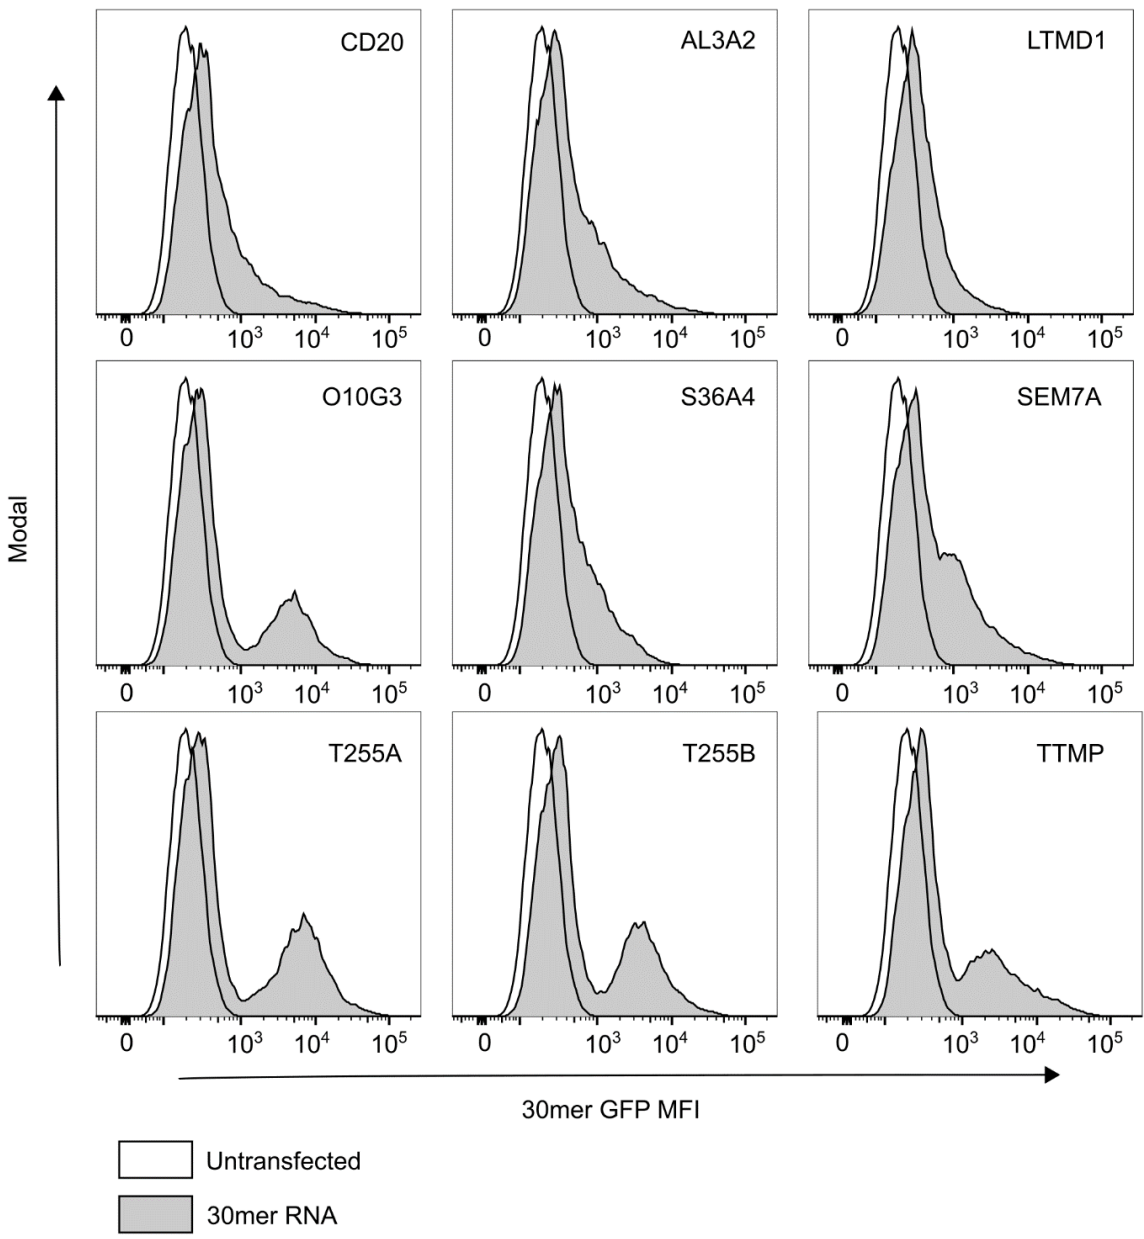

**Supplementary Figure 4. GFP expression in cell lines electroporated with mRNA constructs encoding candidate cross-reactive epitopes**

mRNA constructs encoding 30 AA long peptides containing a 1G4 **(A)** or A23 **(B)** potentially cross-reactive 9-mer in the middle were electroporated into EBV-LCLs (A) or K562 cells (B). Histograms show MFI of the green fluorescent protein (GFP) tag that was used to control for transfection efficiency.

**Supplementary Figure 5**

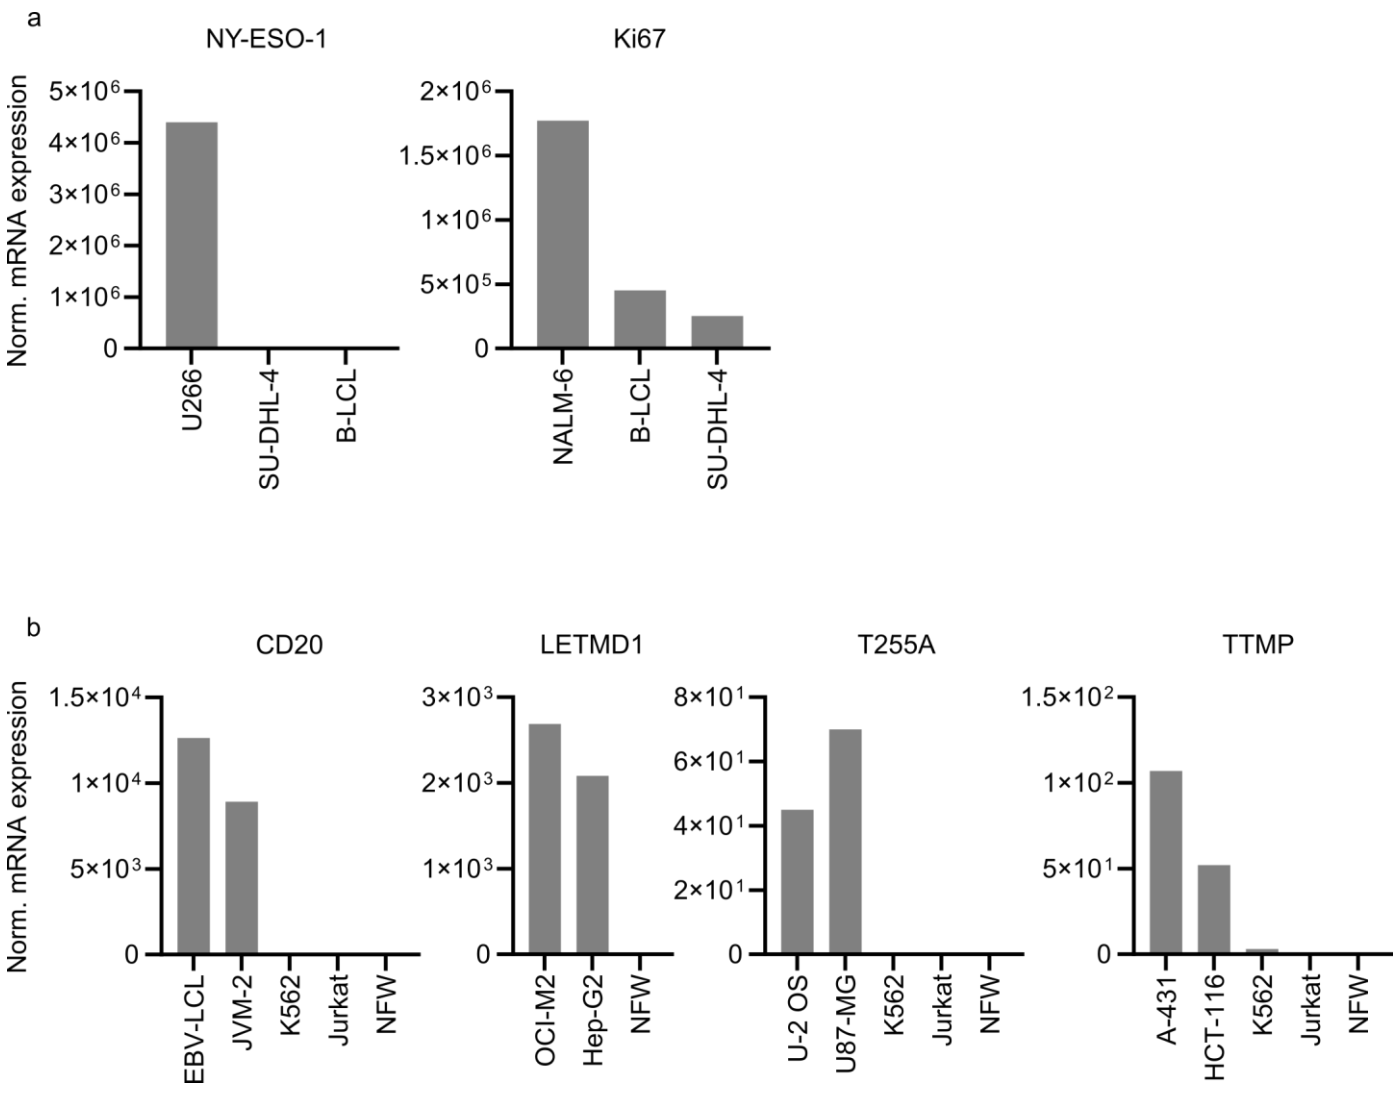

**Supplementary Figure 5. RNA expression of candidate cross-reactive proteins in cell lines**

Expression of NY-ESO-1 and Ki67 **(A)** and CD20, LETMD1, TTMP and T255A **(B)** mRNA in cell lines as determined by qPCR. The 2<sup>Δ</sup>dCt method was employed for normalization and GAPDH or β<sub>2</sub> microglobulin were used as reference genes.





## Supplementary Figure 6. Protein expression of candidate cross-reactive proteins in cell lines

**(A)** Expression of Ki67 in cell lines (in culture) and T cells (directly after thawing) as determined by flow cytometry.

**(B)** Expression of NY-ESO-1 in U266 and Sudhl-4 cell as determined by Western-blot. B-actin used as a house-keeping gene. Blots derive from the same experiment and were processed in parallel.

**(C)** Expression of CD20 in cell lines as determined by flow cytometry.

**(D)** Expression of LETMD1, TTMP and Ki67 in cell lines as determined by mass spectrometry using whole-cell lysates and analyzed with the shotgun DDA method.

Supplementary Figure 7

| HLA-A*01:01 | HLA-A*02:01 | HLA-A*03:01 | HLA-A*11:01 | HLA-A*24:02 | HLA-B*40:01        | HLA-B*44:02         | HLA-B*07:02 |
|-------------|-------------|-------------|-------------|-------------|--------------------|---------------------|-------------|
|             |             | KAFMGTPVQK  | TSLPPLPFK   | NYGTGMERW   | <b>TEIHNEPFLTL</b> | <b>TEIHNEPFLTLW</b> | TPSAGKAML   |
|             |             | IIFVGTPVQK  | IIFVGTPVQK  |             | KEEP LAVSKL        | HEQEAILHNF          |             |
|             |             | TSLPPLPFK   | SVIDEPVRLK  |             | GEEKDINTFL         | SEANLIVAKSW         |             |
|             |             | VMHTPPVLK   | RIQLPVVSK   |             | TEIHNEPFL          | SENLLGKQF           |             |
|             |             | RIQLPVVSK   | LVMHTPPVLK  |             | AEQQITEVFVL        | AEQQITEVFVL         |             |
|             |             | SVIDEPVRLK  |             |             | TEVFLAERI          | AEQQITEVF           |             |
|             |             |             |             |             | IEIHEQEAIL         | AEALEDLVGF          |             |
|             |             |             |             |             |                    | KEIERPFETY          |             |

Supplementary Figure 7. Ki67-derived peptides identified by MS of eluted HLA ligands from mono-allelic B721.221 cell lines

Ki67-derived peptides identified during the immunopeptidomics profiling of HLA mono-allelic B721.221 cells by mass-spectrometry. The two peptides overlapping with the FLTLWLTQV-Ki67 sequence are displayed in bold.

Supplementary Figure 8

Alignment of HLA-A\*02:01, HLA-A\*02:03, HLA-A\*02:06, and HLA-A\*02:7

|               |                                                                                                                              |     |
|---------------|------------------------------------------------------------------------------------------------------------------------------|-----|
| A*02_01_01_01 | MAVMAPRTLVLVLLLSGALALTQTWAGSHSMRYFFTSVSRPGRGEPRFIAVGYVDDTQFVRF                                                               | 60  |
| A*02_03_01_01 | MAVMAPRTLVLVLLLSGALALTQTWAGSHSMRYFFTSVSRPGRGEPRFIAVGYVDDTQFVRF                                                               | 60  |
| A*02_06_01_01 | MAVMAPRTLVLVLLLSGALALTQTWAGSHSMRYFYTSVSRPGRGEPRFIAVGYVDDTQFVRF                                                               | 60  |
| A*02_07_01_01 | MAVMAPRTLVLVLLLSGALALTQTWAGSHSMRYFFTSVSRPGRGEPRFIAVGYVDDTQFVRF                                                               | 60  |
|               | *****:*****                                                                                                                  |     |
| A*02_01_01_01 | DSDAASQRMEPRAPWIEQEGPEYWDGETRKVK <del>AHS</del> QTHRVDLGLTRGYNQSEAGSHTVQ                                                     | 120 |
| A*02_03_01_01 | DSDAASQRMEPRAPWIEQEGPEYWDGETRKVK <del>AHS</del> QTHRVDLGLTRGYNQSEAGSHTVQ                                                     | 120 |
| A*02_06_01_01 | DSDAASQRMEPRAPWIEQEGPEYWDGETRKVK <del>AHS</del> QTHRVDLGLTRGYNQSEAGSHTVQ                                                     | 120 |
| A*02_07_01_01 | DSDAASQRMEPRAPWIEQEGPEYWDGETRKVK <del>AHS</del> QTHRVDLGLTRGYNQSEAGSHTVQ                                                     | 120 |
|               | *****:*****:                                                                                                                 |     |
| A*02_01_01_01 | RMYGCDVGS <del>DWR</del> FLRGYHQYAYDGKDYIALKEDLRSWTAADMAAQTTKHKWEA <del>AH</del> VAEQ                                        | 180 |
| A*02_03_01_01 | RMYGCDVGS <del>DWR</del> FLRGYHQYAYDGKDYIALKEDLRSWTAADMAAQTTKHKWE <del>TA</del> HEAEQ                                        | 180 |
| A*02_06_01_01 | RMYGCDVGS <del>DWR</del> FLRGYHQYAYDGKDYIALKEDLRSWTAADMAAQTTKHKWEA <del>AH</del> VAEQ                                        | 180 |
| A*02_07_01_01 | RM <del>C</del> GCDVGS <del>DWR</del> FLRGYHQYAYDGKDYIALKEDLRSWTAADMAAQTTKHKWEA <del>AH</del> VAEQ                           | 180 |
|               | **:*:*****:*.***.                                                                                                            |     |
| A*02_01_01_01 | <del>R</del> AYLEGTCVEWLRRYLENGKETLQRTDAPKTHMTHHAVSDHEATLRCWALSFP <del>AE</del> ITLT                                         | 240 |
| A*02_03_01_01 | <del>R</del> AYLEGTCVEWLRRYLENGKETLQRTDAPKTHMTHHAVSDHEATLRCWALSFP <del>AE</del> ITLT                                         | 240 |
| A*02_06_01_01 | <del>R</del> AYLEGTCVEWLRRYLENGKETLQRTDAPKTHMTHHAVSDHEATLRCWALSFP <del>AE</del> ITLT                                         | 240 |
| A*02_07_01_01 | <del>R</del> AYLEGTCVEWLRRYLENGKETLQRTDAPKTHMTHHAVSDHEATLRCWALSFP <del>AE</del> ITLT                                         | 240 |
|               | *****                                                                                                                        |     |
| A*02_01_01_01 | WQRDGEDQTQDTELVE <del>TR</del> PAGDGT <del>FQ</del> KWAAVVVPSGQE <del>Q</del> RYTCHVQHEGLPKPL <del>TL</del> RWEP             | 300 |
| A*02_03_01_01 | WQRDGEDQTQDTELVE <del>TR</del> PAGDGT <del>FQ</del> KWAAVVVPSGQE <del>Q</del> RYTCHVQHEGLPKPL <del>TL</del> RWEP             | 300 |
| A*02_06_01_01 | WQRDGEDQTQDTELVE <del>TR</del> PAGDGT <del>FQ</del> KWAAVVVPSGQE <del>Q</del> RYTCHVQHEGLPKPL <del>TL</del> RWEP             | 300 |
| A*02_07_01_01 | WQRDGEDQTQDTELVE <del>TR</del> PAGDGT <del>FQ</del> KWAAVVVPSGQE <del>Q</del> RYTCHVQHEGLPKPL <del>TL</del> RWEP             | 300 |
|               | *****                                                                                                                        |     |
| A*02_01_01_01 | SSQPTIPIVGI <del>I</del> AGLVLF <del>G</del> AVITGAVVA <del>AV</del> MWRKSSDRKGGSY <del>S</del> QAASSDSAQGS <del>D</del> VSL | 360 |
| A*02_03_01_01 | SSQPTIPIVGI <del>I</del> AGLVLF <del>G</del> AVITGAVVA <del>AV</del> MWRKSSDRKGGSY <del>S</del> QAASSDSAQGS <del>D</del> VSL | 360 |
| A*02_06_01_01 | SSQPTIPIVGI <del>I</del> AGLVLF <del>G</del> AVITGAVVA <del>AV</del> MWRKSSDRKGGSY <del>S</del> QAASSDSAQGS <del>D</del> VSL | 360 |
| A*02_07_01_01 | SSQPTIPIVGI <del>I</del> AGLVLF <del>G</del> AVITGAVVA <del>AV</del> MWRKSSDRKGGSY <del>S</del> QAASSDSAQGS <del>D</del> VSL | 360 |
|               | *****                                                                                                                        |     |
| A*02_01_01_01 | TACKV 365                                                                                                                    |     |
| A*02_03_01_01 | TACKV 365                                                                                                                    |     |
| A*02_06_01_01 | TACKV 365                                                                                                                    |     |
| A*02_07_01_01 | TACKV 365                                                                                                                    |     |
|               | *****                                                                                                                        |     |

Supplementary Figure 8. Alignment of the amino acid sequences of HLA-A\*02:01, -A\*02:03, -A\*02:06, and -A\*02:07

Sequence alignment showing that conserved contacts formed between HLA-A\*02 residues and  $\alpha\beta$  TCRs are identical in depicted HLA-A\*02 alleles (red). Differences to HLA-A\*02:01 are shown in blue.

**Supplementary Figure 9**

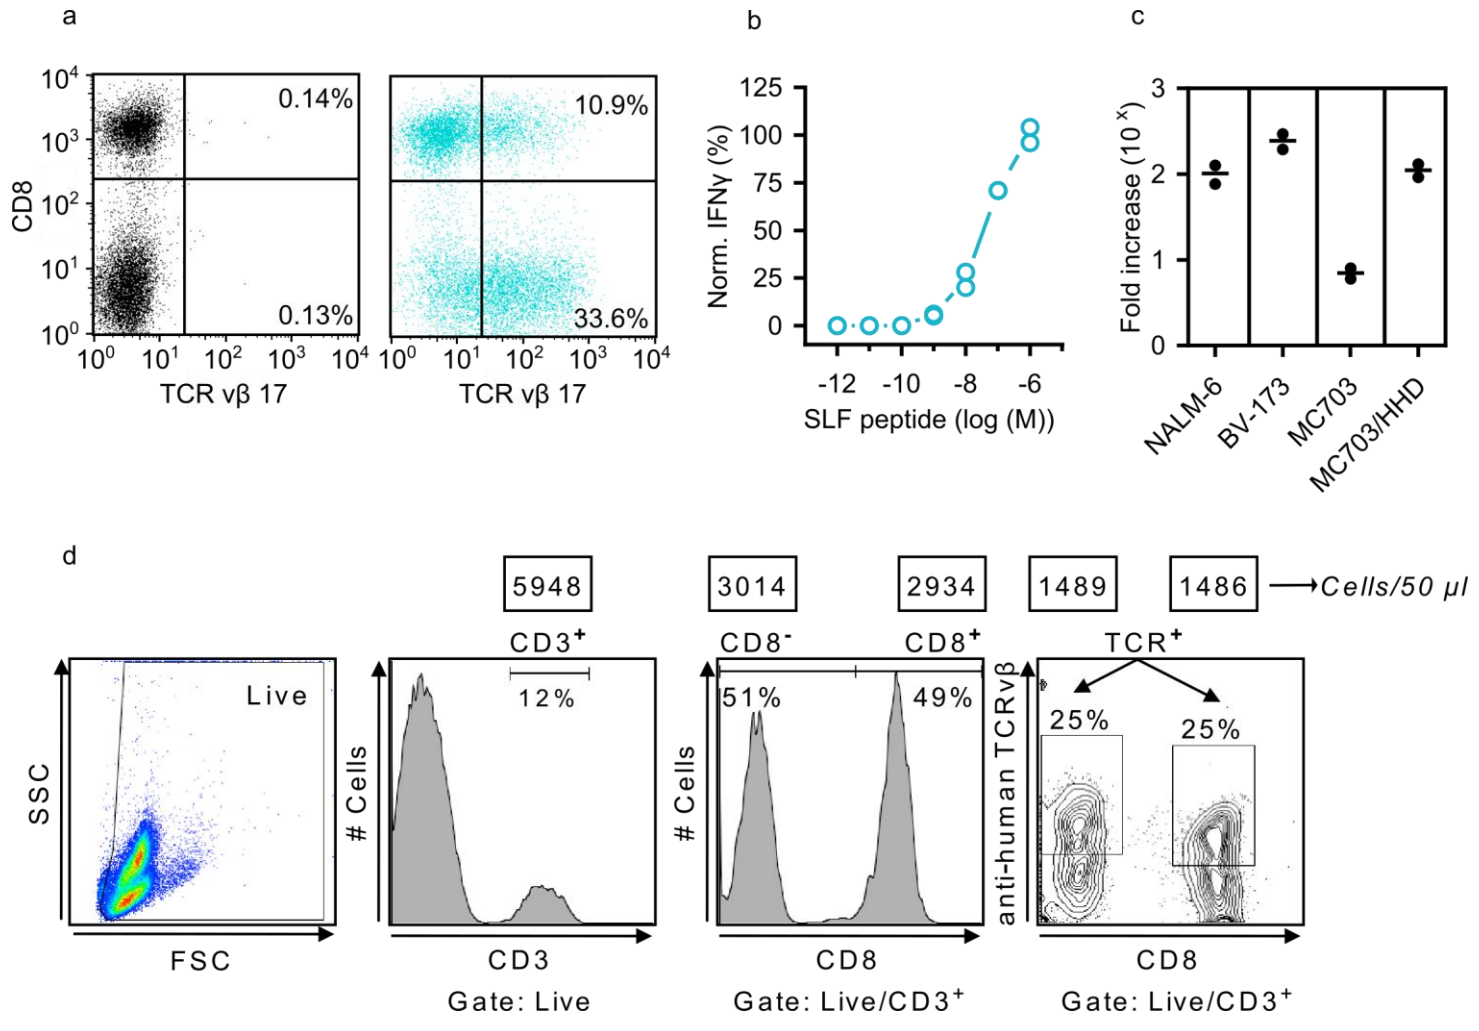

**Supplementary Figure 9. A23 TCR is expressed on splenocytes of HHD mice and is reactive to the cognate peptide.**

**(A)** T cells were isolated from spleens of HHD mice and retrovirally transduced with TCR-encoding vectors. TCR-expression was determined by flow cytometry 10 days after transduction, using TCR $\nu\beta$ - and CD8-specific antibodies. The percentage of TCR<sup>+</sup>CD8<sup>+</sup> T cells is depicted in the upper right quadrant.

**(B)** TCR-engineered HHD T cells were incubated with irradiated HHD mouse splenocytes loaded with indicated amounts of SLF peptide. Supernatants of 24 h co-cultures were analyzed for IFN- $\gamma$  content by ELISA. The relative amount of IFN- $\gamma$  refers to 10<sup>-6</sup> M of SLF peptide. Data shown are technical replicates and representative of 2 independent experiments.

**(C)** Expression of HLA-A2 measured by flow cytometry of naturally HLA-A2<sup>+</sup> human NALM-6, BV-173 cell lines and MC703 cells generated in HHD mice. To reach HLA-A2 levels comparable to the human cell lines, retroviral transduction of additional HHD transgene was necessary (MC703/HHD).

**(D)** Gating strategy for assessment of the number of transduced effector cells in a sample. Effector cells were identified as live single cells staining positively with CD3, CD8 and anti-human TCR $\nu\beta$ . Total cells in each sample were measured to determine total cell counts per 50  $\mu$ l blood.

Supplementary Table 1

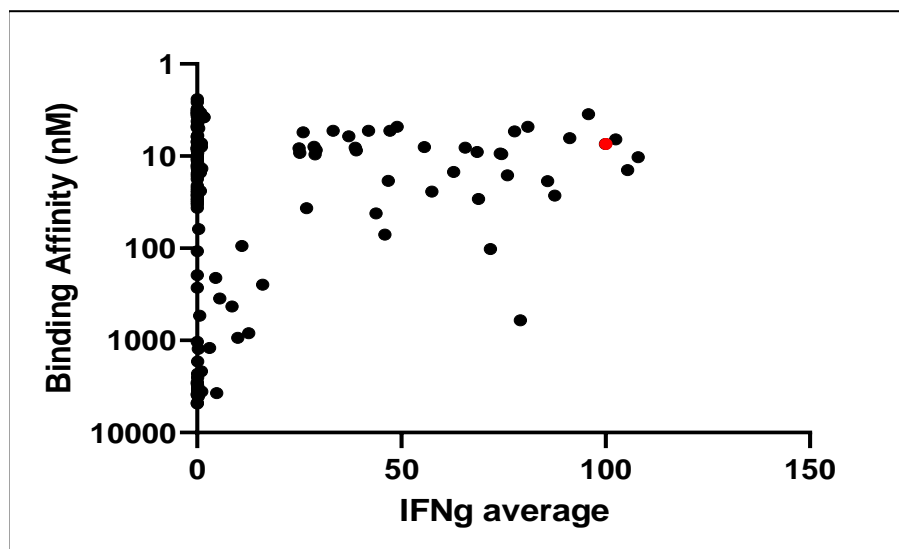

| Sequence  | Normalized IFNg average | Binding affinity score |
|-----------|-------------------------|------------------------|
| ALFLGILSV | 65,66217843             | 8.1                    |
| CLFLGILSV | 87,55784193             | 26.8                   |
| DLFLGILSV | 5,575920782             | 351.8                  |
| ELFLGILSV | 71,82433757             | 102.3                  |
| FLFLGILSV | 95,78223227             | 3.5                    |
| GLFLGILSV | 68,56298101             | 9.0                    |
| HLFLGILSV | 105,3632177             | 14.2                   |
| ILFLGILSV | 28,61487715             | 7.9                    |
| KLFLGILSV | 33,25350107             | 5.3                    |
| LLFLGILSV | 24,98537512             | 8.2                    |
| MLFLGILSV | 48,9759336              | 4.8                    |
| NLFLGILSV | 62,75775618             | 14.8                   |
| PLFLGILSV | 16,01384019             | 249.1                  |
| QLFLGILSV | 75,98739813             | 16.1                   |
| RLFLGILSV | 29,13425642             | 8.6                    |
| TLFLGILSV | 74,54996636             | 9.5                    |
| VLFLGILSV | 74,23805537             | 9.4                    |
| WLFLGILSV | 38,74309684             | 8.1                    |
| SAFLGILSV | 4,575310221             | 209.9                  |
| SCFLGILSV | 12,65142624             | 834.6                  |
| SDFLGILSV | 1,11152542              | 3602.5                 |
| SEFLGILSV | 0,139129678             | 3204.7                 |
| SFFLGILSV | 9,936097056             | 936.7                  |
| SGFLGILSV | 0,104847858             | 2293.3                 |
| SHFLGILSV | 0,288353833             | 4043.7                 |
| SIFLGILSV | 57,48201431             | 24.2                   |
| SKFLGILSV | 0,021307888             | 2951.8                 |
| SMFLGILSV | 77,70161842             | 5.4                    |
| SNFLGILSV | 0,098758457             | 3126.9                 |
| SPFLGILSV | 0,11232253              | 4026.9                 |
| SQFLGILSV | 26,81057347             | 36.8                   |
| SRFLGILSV | 0,01286841              | 3815.0                 |
| SSFLGILSV | 8,580676693             | 427.8                  |
| STFLGILSV | 45,94070153             | 70.8                   |
| SVFLGILSV | 43,75741924             | 41.8                   |



|           |             |        |
|-----------|-------------|--------|
| SWFLGILSV | 0,298527428 | 1231.3 |
| SYFLGILSV | 1,055545942 | 2168.7 |
| SLALGILSV | 0,061990423 | 10.0   |
| SLCLGILSV | 0           | 36.5   |
| SLDLGILSV | 0           | 12.8   |
| SLELGILSV | 0           | 107.4  |
| SLGLGILSV | 0,021961348 | 31.8   |
| SLHLGILSV | 0           | 30.0   |
| SLILGILSV | 0,01701951  | 10.2   |
| SLKLGILSV | 0,003281301 | 196.1  |
| SLLLGILSV | 0,033182512 | 8.7    |
| SLMLGILSV | 0,165420539 | 4.4    |
| SLNLGILSV | 0,025242649 | 20.9   |
| SLPLGILSV | 0,021961348 | 26.8   |
| SLQLGILSV | 0,188434548 | 30.3   |
| SLRLGILSV | 0,015306394 | 268.3  |
| SLSLGILSV | 0,248229782 | 14.9   |
| SLTLGILSV | 0           | 24.9   |
| SLVLGILSV | 0,077263336 | 23.7   |
| SLWLGILSV | 91,23234624 | 6.4    |
| SLYLGILSV | 0,094062277 | 8.2    |
| SLFAGILSV | 0           | 3.3    |
| SLFCGILSV | 0,834226983 | 3.4    |
| SLFDGILSV | 0,060155845 | 2.4    |
| SLFEGILSV | 0           | 2.6    |
| SLFFGILSV | 80,9682604  | 4.8    |
| SLFGGILSV | 0,459197014 | 3.4    |
| SLFHGILSV | 0           | 3.5    |
| SLFIGILSV | 38,93452726 | 8.7    |
| SLFKGILSV | 0,003281301 | 4.2    |
| SLFMGILSV | 25,93599603 | 5.5    |
| SLFNGILSV | 0           | 3.3    |
| SLFPGILSV | 0,073306777 | 3.1    |
| SLFQGILSV | 0           | 4.8    |
| SLFRGILSV | 0,00871731  | 4.7    |
| SLFSGILSV | 0,030212431 | 3.1    |
| SLFTGILSV | 0           | 3.5    |
| SLFVGILSV | 0,190817039 | 6.9    |
| SLFWGILSV | 1,538830737 | 3.8    |
| SLFYGILSV | 0           | 3.7    |
| SLFLAILSV | 0           | 12.5   |
| SLFLCILSV | 0,048581164 | 12.2   |
| SLFLDILSV | 0,029930223 | 8.6    |
| SLFLEILSV | 0,016875264 | 11.1   |
| SLFLFILSV | 0           | 10.1   |
| SLFLHILSV | 0           | 8.3    |
| SLFLIILSV | 0,073569549 | 13.4   |
| SLFLKILSV | 0,120088257 | 12.9   |
| SLFLLILSV | 0,04234132  | 13.2   |
| SLFLMILSV | 0,050157034 | 10.3   |
| SLFLNILSV | 0,161918455 | 12.0   |
| SLFLPILSV | 0,75886321  | 15.1   |
| SLFLQILSV | 0,184499787 | 11.8   |
| SLFLRILSV | 0,043992942 | 17.7   |
| SLFLSILSV | 0,149352612 | 11.1   |
| SLFLTILSV | 0,020000313 | 16.4   |
| SLFLWILSV | 0           | 6.1    |

|           |             |      |
|-----------|-------------|------|
| SLFLYILSV | 0,068961136 | 6.2  |
| SLFLGALSV | 0,00456621  | 15.4 |
| SLFLGCLSV | 0,207139131 | 13.4 |
| SLFLGDLSV | 0           | 11.1 |
| SLFLGELSV | 0,003281301 | 12.1 |
| SLFLGFLSV | 0,055236118 | 10.7 |
| SLFLGGLSV | 0           | 27.1 |
| SLFLGHLSV | 0           | 15.4 |
| SLFLGKLSV | 0,048581164 | 22.3 |
| SLFLGLLSV | 0,38215147  | 7.9  |
| SLFLGMLSV | 0,045415813 | 8.3  |
| SLFLGNLSV | 0           | 8.5  |
| SLFLGPLSV | 0,101820795 | 9.2  |
| SLFLGQLSV | 0,056324879 | 9.7  |
| SLFLGRLSV | 0           | 33.6 |
| SLFLGSLSV | 0           | 9.3  |
| SLFLGTLSV | 1,064428276 | 7.3  |
| SLFLGVLSV | 25,10681133 | 9.2  |
| SLFLGYLSV | 0           | 11.3 |
| SLFLGIASV | 0,00865144  | 7.0  |
| SLFLGICSV | 1,053227292 | 7.9  |
| SLFLGIDSV | 0           | 10.2 |
| SLFLGIESV | 0,041719402 | 9.8  |
| SLFLGIFSV | 0,290905734 | 3.7  |
| SLFLGIGSV | 0,083096538 | 22.1 |
| SLFLGIHSV | 0,046406975 | 4.9  |
| SLFLGIISV | 102,4260427 | 6.6  |
| SLFLGIKSV | 0,022910898 | 26.4 |
| SLFLGIMSV | 41,9867016  | 5.3  |
| SLFLGINSV | 0,018281536 | 8.2  |
| SLFLGIPSV | 0,037031829 | 3.4  |
| SLFLGIQSV | 0,055782122 | 8.0  |
| SLFLGIRSV | 0,113094878 | 25.0 |
| SLFLGISSV | 0,089958072 | 7.4  |
| SLFLGITSV | 37,11996828 | 6.1  |
| SLFLGIVSV | 99,94318288 | 7.4  |
| SLFLGIWSV | 0,12227345  | 3.1  |
| SLFLGIYSV | 1,715298723 | 3.8  |
| SLFLGILAV | 28,84076829 | 9.6  |
| SLFLGILCV | 1,111529107 | 13.6 |
| SLFLGILDV | 0,751552831 | 23.9 |
| SLFLGILEV | 0,12609572  | 6.0  |
| SLFLGILFV | 0,079219988 | 7.0  |
| SLFLGILGV | 55,62532235 | 8.0  |
| SLFLGILHV | 0,403211733 | 10.9 |
| SLFLGILIV | 0,027644676 | 28.8 |
| SLFLGILKV | 0,022969109 | 13.0 |
| SLFLGILLV | 0,22724709  | 11.9 |
| SLFLGILMV | 0,120306069 | 14.5 |
| SLFLGILNV | 0,027656682 | 9.5  |
| SLFLGILPV | 47,18036887 | 5.3  |
| SLFLGILQV | 0,242935786 | 13.3 |
| SLFLGILRV | 0           | 13.5 |
| SLFLGILTV | 107,9515958 | 10.3 |
| SLFLGILVV | 0           | 20.9 |
| SLFLGILWV | 0,092933442 | 9.4  |
| SLFLGILYV | 0,414148219 | 5.0  |

|           |             |        |
|-----------|-------------|--------|
| SLFLGILSA | 68,84737693 | 29.1   |
| SLFLGILSC | 79,15731149 | 607.2  |
| SLFLGILSD | 0,004218816 | 4778.2 |
| SLFLGILSE | 0,043628572 | 3903.4 |
| SLFLGILSF | 0,008906389 | 1033.1 |
| SLFLGILSG | 3,016711123 | 1209.2 |
| SLFLGILSH | 0,046406975 | 4854.0 |
| SLFLGILSI | 85,76850666 | 18.7   |
| SLFLGILSK | 0,018281536 | 3743.4 |
| SLFLGILSL | 46,76174769 | 18.5   |
| SLFLGILSM | 0,338363576 | 61.9   |
| SLFLGILSN | 4,773542615 | 3737.5 |
| SLFLGILSP | 0,125151205 | 1687.0 |
| SLFLGILSQ | 0,018281536 | 2851.8 |
| SLFLGILSR | 0,128928404 | 3497.6 |
| SLFLGILSS | 0,660947827 | 539.0  |
| SLFLGILST | 10,93775825 | 94.4   |
| SLFLGILSW | 0,083907561 | 2525.2 |
| SLFLGILSY | 0,134659844 | 3358.7 |
| SLFLGILSV | 100         | 7.4    |

**Supplementary Table 1 Predicted binding affinities of all A23 TCR peptide mimotopes used in our study.**

Correlation of IFN- $\gamma$  production and predicted binding affinity is shown, with the cognate target peptide marked in red.

**Supplementary Table 2**

| Gene    | Sequence  | Edit distance | nM      | Rank   | Binding strength | Cut-off |
|---------|-----------|---------------|---------|--------|------------------|---------|
| KI67    | FLTLWLTQV | 5             | 6.1     | 0.050  | SB               | 10 %    |
| FGRL1   | TLLLWLCQA | 5             | 121.7   | 1.200  | WB               |         |
| NY-ESO1 | SLLMWITQC | 0             | 666.7   | 3.500  |                  |         |
| TM245   | VLDLWLTQG | 5             | 5508.9  | 10.000 |                  |         |
| AT135   | TLTLWLSQG | 6             | 11434.4 | 17.000 |                  |         |
| AGRB3   | SLGTWSTQG | 4             | 15177.0 | 21.000 |                  |         |
| CSN2    | ALDKWTNQL | 6             | 80.3    | 0.900  | WB               | 5 %     |
| TMUB1   | LLLLWYCQI | 5             | 85.3    | 1.000  | WB               |         |
| PPR37   | TLVLWNNQL | 6             | 403.1   | 2.500  |                  |         |
| F231L   | ILLVWNSQT | 5             | 796.3   | 3.500  |                  |         |
| DXO     | KLLKWWAQS | 5             | 1214.6  | 4.500  |                  |         |
| PLSI    | IIIKWVNQT | 7             | 3204.9  | 7.500  |                  |         |

**Supplementary Table 2 List of candidate off-target peptides for 1G4 TCR based on TCR-fingerprint**

List of potentially 1G4 TCR cross-reactive peptides identified in a search using ScanProSite tool with data generated from the peptide library screen presented in Fig. 1A. Edit distance is the minimal number of amino acid exchanges that is needed to reach the original target sequence. HLA-A2 binding affinity (nM) and Rank was predicted by NetMHC 4.0. SB – predicted strong binder, WB- predicted weak binder.

**Supplementary Table 3**

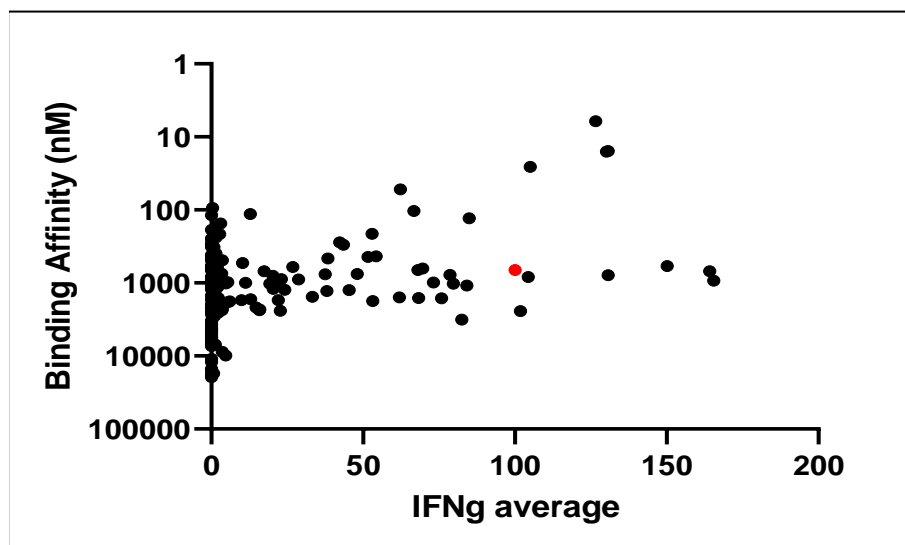

| Sequence  | Normalized IFNg average | Binding affinity score |
|-----------|-------------------------|------------------------|
| ALLMWITQC | <b>48,10</b>            | 755.5                  |
| CLLMWITQC | <b>33,26</b>            | 1550.1                 |
| DLLMWITQC | <b>0,00</b>             | 6540.5                 |
| ELLMWITQC | <b>0,00</b>             | 4639.0                 |
| FLLMWITQC | <b>12,82</b>            | 113.6                  |
| GLLMWITQC | <b>73,14</b>            | 987.3                  |
| HLLMWITQC | <b>45,41</b>            | 1250.1                 |
| ILLMWITQC | <b>26,82</b>            | 606.5                  |
| KLLMWITQC | <b>54,28</b>            | 431.5                  |
| LLLMWITQC | <b>68,01</b>            | 668.2                  |
| MLLMWITQC | <b>42,24</b>            | 277.9                  |
| NLLMWITQC | <b>0,00</b>             | 1494.6                 |
| PLLMWITQC | <b>0,00</b>             | 6996.8                 |
| QLLMWITQC | <b>75,87</b>            | 1617.1                 |
| RLLMWITQC | <b>78,56</b>            | 777.9                  |
| TLLMWITQC | <b>84,21</b>            | 1080.6                 |
| VLLMWITQC | <b>104,40</b>           | 828.1                  |
| WLLMWITQC | <b>20,27</b>            | 801.3                  |
| YLLMWITQC | <b>84,96</b>            | 129.8                  |
| SALMWITQC | <b>3,65</b>             | 8746.3                 |
| SCLMWITQC | <b>4,72</b>             | 9890.7                 |
| SDLMWITQC | <b>0,00</b>             | 19388.6                |
| SELMWITQC | <b>0,70</b>             | 17367.0                |
| SFLMWITQC | <b>0,00</b>             | 10994.1                |
| SGLMWITQC | <b>0,00</b>             | 15853.9                |
| SHLMWITQC | <b>0,00</b>             | 19281.3                |
| SILMWITQC | <b>82,49</b>            | 3181.5                 |
| SKLMWITQC | <b>0,00</b>             | 18020.7                |
| SMLMWITQC | <b>150,20</b>           | 589.0                  |
| SNLMWITQC | <b>0,00</b>             | 19019.8                |
| SPLMWITQC | <b>0,00</b>             | 18632.0                |
| SQLMWITQC | <b>0,00</b>             | 4375.8                 |
| SRLMWITQC | <b>0,00</b>             | 18782.0                |

|           |               |         |
|-----------|---------------|---------|
| SSLMWITQC | <b>0,00</b>   | 10551.3 |
| STLMWITQC | <b>0,00</b>   | 6214.3  |
| SVLMWITQC | <b>0,00</b>   | 4565.1  |
| SWLMWITQC | <b>0,00</b>   | 12097.5 |
| SYLMWITQC | <b>0,00</b>   | 15096.6 |
| SLAMWITQC | <b>79,73</b>  | 1027.2  |
| SLCMWITQC | <b>53,17</b>  | 1763.7  |
| SLDMWITQC | <b>38,02</b>  | 1295.0  |
| SLEMWITQC | <b>0,00</b>   | 4565.4  |
| SLFMWITQC | <b>51,65</b>  | 438.9   |
| SLGMWITQC | <b>22,67</b>  | 2406.9  |
| SLHMWITQC | <b>15,86</b>  | 2366.1  |
| SLIMWITQC | <b>130,77</b> | 786.1   |
| SLKMWITQC | <b>0,16</b>   | 6321.2  |
| SLMMWITQC | <b>52,91</b>  | 211.7   |
| SLNMWITQC | <b>14,75</b>  | 2170.3  |
| SLPMWITQC | <b>0,00</b>   | 2486.5  |
| SLQMWITQC | <b>101,83</b> | 2439.3  |
| SLRMWITQC | <b>0,00</b>   | 5773.3  |
| SLSMWITQC | <b>61,90</b>  | 1583.7  |
| SLTMWITQC | <b>15,91</b>  | 2304.8  |
| SLVMWITQC | <b>68,23</b>  | 1603.1  |
| SLWMWITQC | <b>43,48</b>  | 300.0   |
| SLYMWITQC | <b>0,00</b>   | 582.8   |
| SLLAWITQC | <b>0,00</b>   | 309.7   |
| SLLCWITQC | <b>0,83</b>   | 325.3   |
| SLLDWITQC | <b>0,34</b>   | 93.7    |
| SLLEWITQC | <b>0,00</b>   | 117.9   |
| SLLFWITQC | <b>0,00</b>   | 639.9   |
| SLLGWITQC | <b>0,00</b>   | 322.1   |
| SLLHWITQC | <b>0,00</b>   | 414.0   |
| SLLIWITQC | <b>0,00</b>   | 1033.4  |
| SLLKWITQC | <b>164,17</b> | 687.9   |
| SLLLWITQC | <b>165,51</b> | 933.4   |
| SLLNWITQC | <b>0,00</b>   | 316.1   |
| SLLPWITQC | <b>0,00</b>   | 291.4   |
| SLLQWITQC | <b>69,56</b>  | 636.5   |
| SLLRWITQC | <b>0,00</b>   | 906.1   |
| SLLSWITQC | <b>0,00</b>   | 292.1   |
| SLLTWITQC | <b>38,38</b>  | 464.1   |
| SLLVWITQC | <b>19,30</b>  | 1028.2  |
| SLLWWITQC | <b>0,00</b>   | 424.4   |
| SLLYWITQC | <b>0,00</b>   | 491.2   |
| SLLMAITQC | <b>0,68</b>   | 1973.7  |
| SLLMCITQC | <b>1,66</b>   | 1015.1  |
| SLLMDITQC | <b>1,84</b>   | 1896.6  |
| SLLMEITQC | <b>1,04</b>   | 2313.0  |
| SLLMFITQC | <b>0,00</b>   | 820.0   |
| SLLMGITQC | <b>0,00</b>   | 1683.4  |
| SLLMHITQC | <b>1,12</b>   | 1787.5  |
| SLLMIITQC | <b>0,00</b>   | 1219.5  |
| SLLMKITQC | <b>0,00</b>   | 2615.7  |
| SLLMLITQC | <b>0,00</b>   | 1159.3  |
| SLLMMITQC | <b>1,21</b>   | 1334.9  |
| SLLMNITQC | <b>0,00</b>   | 2440.2  |

|           |              |        |
|-----------|--------------|--------|
| SLLMPITQC | <b>0,27</b>  | 2822.5 |
| SLLMQITQC | <b>1,23</b>  | 2571.5 |
| SLLMRITQC | <b>2,24</b>  | 2556.1 |
| SLLMSITQC | <b>0,00</b>  | 1961.6 |
| SLLMTITQC | <b>0,00</b>  | 1699.3 |
| SLLMVITQC | <b>0,00</b>  | 1211.1 |
| SLLMYITQC | <b>1,05</b>  | 731.6  |
| SLLMWATQC | <b>0,00</b>  | 2217.2 |
| SLLMWCTQC | <b>0,00</b>  | 1175.1 |
| SLLMWDTQC | <b>1,36</b>  | 2286.9 |
| SLLMWETQC | <b>0,00</b>  | 2801.6 |
| SLLMWFTQC | <b>2,54</b>  | 1077.1 |
| SLLMWGTQC | <b>0,00</b>  | 3763.9 |
| SLLMWHTQC | <b>0,00</b>  | 3407.0 |
| SLLMWKTQC | <b>0,00</b>  | 5482.2 |
| SLLMWLTQC | <b>37,45</b> | 758.9  |
| SLLMWMTQC | <b>21,68</b> | 1045.8 |
| SLLMWNTQC | <b>5,59</b>  | 1818.3 |
| SLLMWPTQC | <b>2,29</b>  | 1605.2 |
| SLLMWQTQC | <b>0,87</b>  | 2202.7 |
| SLLMWRTQC | <b>0,00</b>  | 5968.1 |
| SLLMWSTQC | <b>22,01</b> | 1715.0 |
| SLLMWTTQC | <b>24,14</b> | 1246.7 |
| SLLMWVTQC | <b>28,77</b> | 893.8  |
| SLLMWWTQC | <b>9,91</b>  | 1721.5 |
| SLLMWYTC  | <b>6,00</b>  | 1792.1 |
| SLLMWIAQC | <b>10,29</b> | 534.3  |
| SLLMWICQC | <b>23,08</b> | 886.1  |
| SLLMWIDQC | <b>20,44</b> | 1205.8 |
| SLLMWIEQC | <b>2,90</b>  | 1010.7 |
| SLLMWIFQC | <b>2,68</b>  | 214.4  |
| SLLMWIGQC | <b>3,62</b>  | 2258.9 |
| SLLMWIHQC | <b>0,00</b>  | 484.2  |
| SLLMWIIQC | <b>0,00</b>  | 570.1  |
| SLLMWIKQC | <b>1,04</b>  | 2831.5 |
| SLLMWILQC | <b>0,00</b>  | 673.5  |
| SLLMWIMQC | <b>0,00</b>  | 458.6  |
| SLLMWINQC | <b>5,37</b>  | 976.4  |
| SLLMWIPQC | <b>0,00</b>  | 253.4  |
| SLLMWIQQC | <b>4,79</b>  | 1015.5 |
| SLLMWIRQC | <b>0,00</b>  | 2622.9 |
| SLLMWISQC | <b>11,28</b> | 993.5  |
| SLLMWIVQC | <b>3,40</b>  | 748.8  |
| SLLMWIWQC | <b>1,76</b>  | 166.2  |
| SLLMWIYQC | <b>0,00</b>  | 248.7  |
| SLLMWITAC | <b>0,00</b>  | 419.9  |
| SLLMWITCC | <b>1,74</b>  | 558.9  |
| SLLMWITDC | <b>0,00</b>  | 1081.6 |
| SLLMWITEC | <b>1,54</b>  | 237.9  |
| SLLMWITFC | <b>0,00</b>  | 251.5  |
| SLLMWITGC | <b>1,53</b>  | 397.6  |
| SLLMWITHC | <b>3,62</b>  | 489.3  |
| SLLMWITIC | <b>0,00</b>  | 1066.4 |
| SLLMWITKC | <b>0,00</b>  | 831.4  |
| SLLMWITLC | <b>0,00</b>  | 472.1  |

|           |               |        |
|-----------|---------------|--------|
| SLLMWITMC | <b>1,96</b>   | 607.0  |
| SLLMWITNC | <b>0,00</b>   | 457.8  |
| SLLMWITPC | <b>0,00</b>   | 187.9  |
| SLLMWITRC | <b>0,00</b>   | 675.6  |
| SLLMWITSC | <b>0,00</b>   | 311.4  |
| SLLMWITTC | <b>1,46</b>   | 399.2  |
| SLLMWITVC | <b>0,00</b>   | 864.0  |
| SLLMWITWC | <b>0,00</b>   | 437.4  |
| SLLMWITYC | <b>3,11</b>   | 153.4  |
| SLLMWITQA | <b>105,04</b> | 25.7   |
| SLLMWITQD | <b>0,00</b>   | 7331.1 |
| SLLMWITQE | <b>0,00</b>   | 5932.6 |
| SLLMWITQF | <b>2,04</b>   | 1138.1 |
| SLLMWITQG | <b>12,89</b>  | 1666.0 |
| SLLMWITQH | <b>1,29</b>   | 6963.6 |
| SLLMWITQI | <b>130,18</b> | 16.0   |
| SLLMWITQK | <b>0,00</b>   | 5266.9 |
| SLLMWITQL | <b>130,75</b> | 15.6   |
| SLLMWITQM | <b>62,28</b>  | 52.1   |
| SLLMWITQN | <b>0,64</b>   | 5502.5 |
| SLLMWITQP | <b>3,46</b>   | 2361.3 |
| SLLMWITQQ | <b>0,00</b>   | 4169.6 |
| SLLMWITQR | <b>0,00</b>   | 5076.7 |
| SLLMWITQS | <b>17,35</b>  | 690.1  |
| SLLMWITQT | <b>66,77</b>  | 103.5  |
| SLLMWITQV | <b>126,64</b> | 6.1    |
| SLLMWITQW | <b>0,00</b>   | 3312.0 |
| SLLMWITQY | <b>0,00</b>   | 4299.4 |
| SLLMWITQC | <b>100,00</b> | 666.7  |

Supplementary Table 3 Predicted binding affinities of all 1G4 TCR peptide mimotopes used in the study.

Correlation of IFN- $\gamma$  production and predicted binding affinity is shown, with the cognate target peptide marked in red.



**Supplementary Table 4**

| Gene            | Sequence   | Edit distance | nM      | Rank   | Binding strength | Cut-off |
|-----------------|------------|---------------|---------|--------|------------------|---------|
| CD20            | SLFLGILSV  | 0             | 7.4     | 0.070  | SB               | 10 %    |
| CD6             | WLFFGITGL  | 5             | 9.6     | 0.125  | SB               |         |
| S52A3           | LLFLGVLSV  | 2             | 10.3    | 0.125  | SB               |         |
| ARAIID          | LMFFGILGA  | 5             | 13.5    | 0.175  | SB               |         |
| BTNL8           | GLFFGIVGL  | 5             | 14.7    | 0.200  | SB               |         |
| TTMP            | SIFLGVITV  | 4             | 42.6    | 0.600  | WB               |         |
| S36A4           | LVFIGIISV  | 4             | 48.3    | 0.600  | WB               |         |
| T255A/<br>T255B | GLFLGIITA  | 4             | 50.1    | 0.600  | WB               |         |
| SEM7A           | SLWLGVLP   | 3             | 54.9    | 0.700  | WB               |         |
| LETMD1          | CLFLGIISI  | 3             | 73.4    | 0.900  | WB               |         |
| MSH3            | NIFIGIVGV  | 5             | 119.3   | 1.200  | WB               |         |
| AP5S1           | VVWLGVLSL  | 5             | 232.8   | 1.800  | WB               |         |
| ABCA2           | NLFIGITAT  | 5             | 459.0   | 3.000  |                  |         |
| FETUA           | HTFMGVVSL  | 6             | 735.3   | 3.500  |                  |         |
| AL3A2           | LTFLGIVAA  | 5             | 902.7   | 4.000  |                  |         |
| S35F6           | SQWLGILAT  | 4             | 1005.0  | 4.000  |                  |         |
| PAXI1           | QIFFGITAC  | 6             | 5820.1  | 11.000 |                  |         |
| MRP2            | TCFLGIIST  | 4             | 7437.8  | 13.000 |                  |         |
| CML1            | VCFLGILGN  | 4             | 19066.0 | 26.000 |                  |         |
| O10G3           | YIFLGVLSV  | 3             | 7.6     | 0.070  | SB               | 5 %     |
| MARH6           | FAWLGVVPL  | 7             | 70.3    | 0.800  | WB               |         |
| CNR1            | MFWIGVTSV  | 6             | 422.9   | 2.500  |                  |         |
| CYAC3           | HSWLGITTV  | 5             | 865.6   | 4.000  |                  |         |
| POK18           | VSFLGVTTV  | 5             | 991.2   | 4.000  |                  |         |
| CHAD            | GAFLGVTTL  | 6             | 1949.0  | 6.000  |                  |         |
| T255B/2         | GSFLGIIGI  | 5             | 2163.9  | 6.000  |                  |         |
| O10R2           | YFFLGILST  | 3             | 2497.5  | 6.500  |                  |         |
| P4HA2           | MAWFGVLSC  | 6             | 3115.4  | 7.500  |                  |         |
| SEM4F           | GFFLGILAA  | 4             | 4939.8  | 9.500  |                  |         |
| GPR85           | IAFLGVLSC  | 4             | 5689.9  | 11.000 |                  |         |
| S15A3           | AAFFGV TAN | 7             | 25125.3 | 36.000 |                  |         |

**Supplementary Table 4 List of candidate off-target peptides for A23 TCR based on TCR-fingerprint**

List of potentially A23 TCR cross-reactive peptides identified in a search using ScanProSite tool with data generated from the peptide library presented in Fig. 1D. Edit distance is the minimal number of amino acid exchanges that is needed to reach the original target sequence. HLA-A2 binding affinity (nM) and Rank was predicted by NetMHC 4.0. SB – predicted strong binder, WB- predicted weak binder.

Supplementary Table 5

|    | IHW ID | Alternative ID | HLA type |      |      |      |      |        | Origin |
|----|--------|----------------|----------|------|------|------|------|--------|--------|
|    |        |                | A        |      | B    |      | C    |        |        |
| 1  | 1136   | 1362-8575      | 0101     | 1101 | 0702 | 5101 | 0702 | 1502   | FHCRC  |
| 2  | 1170   | 1413-1218      | 6801     | 1101 | 1302 | 0702 | 0303 | 0702   | FHCRC  |
| 3  | 1185   | 1416-1337      | 0205     | 2501 | 4901 | 4402 | 0701 | 0501   | FHCRC  |
| 4  | 9383   | FH9            | 2402     | 3303 | 4801 | 4403 | 0801 | 0701   | FHCRC  |
| 5  | 9387   | FH13           | 3402     | 6802 | 4403 | 1510 | 0401 | 030402 | FHCRC  |
| 6  | 9401   | TER-259        | 3201     | 6802 | 0801 | 4402 | 0102 | 07     | FHCRC  |
| 7  | 9423   | FH36           | 3402     | 7401 | 0801 | 1503 | 0701 | 0202   | FHCRC  |
| 8  | 9431   | FH43           | 3001     | 3301 | 5301 | 8101 | 04   | 08     | FHCRC  |
| 9  | 9441   | FH53           | 2403     | 2407 | 5106 | 3505 | 0401 | 1204   | FHCRC  |
| 10 | 9453   | FH65           | 29       | 30   | 5301 | 4501 | 04   | 0602   | FHCRC  |
| 11 | 9465   | SCL-116A       | 0301     | 3002 | 1801 | 5601 | 0102 | 05     | FHCRC  |
| 12 | 9466   | FH76           | 2402     | 2402 | 5501 | 5501 | 0102 | 0102   | FHCRC  |
| 13 | 9010   | AMAI           | 6802     | 6802 | 5301 | 5301 | 0401 | 0401   | FHCRC  |
| 14 | 9040   | BM15           | 0101     | 0101 | 4901 | 4901 | 0701 | 0701   | FHCRC  |
| 15 | 9043   | BM21           | 0101     | 0101 | 4101 | 4101 | 1701 | 1701   | FHCRC  |
| 16 | 9044   | BRIP           | 2402     | 2402 | 5101 | 1517 | 0701 | 1504   | FHCRC  |
| 17 | 9234   | CRB            | 6602     | 3002 | 1801 | 5801 | 0701 | 0701   | ECACC  |
| 18 | 9366   | DAUDI          | 0102     | 6601 | 5801 | 5802 | 0602 | 0302   | ECACC  |
| 19 | 9210   | DK1            | 0203     | 3301 | 4403 | 4001 | 0304 | 14     | ECACC  |
| 20 | 9080   | EHM            | 0301     | 0301 | 3501 | 3503 | 0401 | 0401   | FHCRC  |
| 21 | 9105   | FPAF           | 0101     | 0101 | 3502 | 3502 | 0401 | 0401   | FHCRC  |
| 22 | 9363   | GRC-187        | 6801     | 3101 | 3511 | 1504 | 0303 | 0304   | ECACC  |
| 23 | 9005   | HOM-2          | 0301     | 0301 | 2705 | 2705 | 0102 | 0102   | FHCRC  |
| 24 | 9009   | KASOII         | 0101     | 0101 | 3701 | 3701 | 0602 | 0602   | FHCRC  |
| 25 | 9073   | KT12           | 2402     | 3101 | 3501 | 5101 | 0401 | 1202   | FHCRC  |
| 26 | 9107   | KT3            | 2402     | 2402 | 5401 | 5401 | 0102 | 0102   | FHCRC  |
| 27 | 9226   | MOLT-4         | 0101     | 2501 | 5701 | 1801 | 0602 | 1203   | ECACC  |
| 28 | 9100   | OLGA           | 3101     | 3101 | 1501 | 1520 | 0102 | 0304   | FHCRC  |
| 29 | 9028   | PE117          | 2402     | 2402 | 4001 | 4002 | 0304 | 0304   | FHCRC  |
| 30 | 9021   | RSH            | 6802     | 3001 | 4201 | 4201 | 1701 | 1701   | FHCRC  |
| 31 | 9076   | T7526          | 0206     | 0207 | 4601 | 4601 | 0102 | 0801   | FHCRC  |
| 32 | 9042   | TISI           | 2402     | 2402 | 3508 | 3508 | 0401 | 0401   | FHCRC  |
| 33 | 9029   | WT51           | 2301     | 2301 | 1401 | 1401 | 0802 | 0802   | FHCRC  |

Supplementary Table 5 B-LCL cell lines with known HLA types included in the panel used for assessment of TCR-reactivity to unintended HLA alleles

Supplementary Table 6

| USA NMDP European Caucasian<br>(n=1 242 890) |                |             |                |             |                |
|----------------------------------------------|----------------|-------------|----------------|-------------|----------------|
| A                                            |                | B           |                | C           |                |
| Allele                                       | Frequency      | Allele      | Frequency      | Allele      | Frequency      |
| A*02:01                                      | 0,276          | B*07:02     | 0,131          | C*07:01     | 0,16           |
| A*01:01                                      | 0,165          | B*08:01     | 0,114          | C*07:02     | 0,141          |
| A*03:01                                      | 0,14           | B*44:02     | 0,095          | C*04:01     | 0,106          |
| A*24:02                                      | 0,085          | B*15:01     | 0,061          | C*05:01     | 0,094          |
| A*11:01                                      | 0,061          | B*35:01     | 0,056          | C*06:02     | 0,093          |
| A*32:01                                      | 0,035          | B*40:01     | 0,053          | C*03:04     | 0,075          |
| A*68:01                                      | 0,032          | B*44:03     | 0,047          | C*03:03     | 0,053          |
| A*31:01                                      | 0,027          | B*51:01     | 0,047          | C*12:03     | 0,049          |
| A*25:01                                      | 0,021          | B*18:01     | 0,044          | C*02:02     | 0,044          |
| A*23:01                                      | 0,02           | B*27:05     | 0,037          | C*08:02     | 0,038          |
| A*30:01                                      | 0,013          | B*57:01     | 0,036          | C*01:02     | 0,034          |
| A*02:05                                      | 0,00966        | B*13:02     | 0,024          | C*15:02     | 0,022          |
| A*30:02                                      | 0,009          | B*55:01     | 0,019          | C*12:02     | 0,00869        |
| A*68:02                                      | 0,00838        | B*35:03     | 0,016          | C*03:02     | 0,00219        |
| A*33:01                                      | 0,0081         | B*49:01     | 0,016          | C*08:01     | 0,00042        |
| A*66:01                                      | 0,00409        | B*37:01     | 0,014          | C*17:01     | 0,00878        |
| A*33:03                                      | 0,00321        | B*40:02     | 0,013          | C*15:04     | 0,00008        |
| A*24:03                                      | 0,00193        | B*14:01     | 0,01           | C*12:04     | 0,00000        |
| A*02:06                                      | 0,00182        | B*35:02     | 0,01           | <b>SUM:</b> | <b>0,92916</b> |
| A*74:01                                      | 0,0004         | B*58:01     | 0,00726        |             |                |
| A*01:02                                      | 0,00011        | B*56:01     | 0,00643        |             |                |
| A*02:07                                      | 0,00004        | B*35:08     | 0,00435        |             |                |
| A*66:02                                      | 0,00003        | B*41:01     | 0,00428        |             |                |
| A*02:03                                      | 0,00002        | B*15:17     | 0,00363        |             |                |
| A*34:02                                      | 0,00092        | B*53:01     | 0,00339        |             |                |
| A*24:07                                      | 0,00007        | B*15:03     | 0,00137        |             |                |
| <b>SUM:</b>                                  | <b>0,92278</b> | B*15:10     | 0,00038        |             |                |
|                                              |                | B*58:02     | 0,00015        |             |                |
|                                              |                | B*46:01     | 0,00008        |             |                |
|                                              |                | B*54:01     | 0,00004        |             |                |
|                                              |                | B*45:01     | 0,00589        |             |                |
|                                              |                | B*48:01     | 0,0007         |             |                |
|                                              |                | B*42:01     | 0,00028        |             |                |
|                                              |                | B*81:01     | 0,00008        |             |                |
|                                              |                | B*35:05     | 0,00004        |             |                |
|                                              |                | B*51:06     | 0,00002        |             |                |
|                                              |                | B*15:04     | 0,00001        |             |                |
|                                              |                | B*35:11     | 0,00001        |             |                |
|                                              |                | B*15:20     | 0,00000        |             |                |
|                                              |                | <b>SUM:</b> | <b>0,88139</b> |             |                |

| USA NMDP Chinese |                |             |                |             |                |
|------------------|----------------|-------------|----------------|-------------|----------------|
| A                |                | B           |                | C           |                |
| Allele           | Frequency      | Allele      | Frequency      | Allele      | Frequency      |
| A*11:01          | 0,275          | B*40:01     | 0,154          | C*07:02     | 0,194          |
| A*24:02          | 0,152          | B*46:01     | 0,134          | C*01:02     | 0,191          |
| A*33:03          | 0,101          | B*58:01     | 0,087          | C*03:04     | 0,116          |
| A*02:01          | 0,095          | B*51:01     | 0,046          | C*08:01     | 0,104          |
| A*02:07          | 0,095          | B*15:01     | 0,03           | C*03:02     | 0,087          |
| A*02:03          | 0,077          | B*54:01     | 0,03           | C*03:03     | 0,047          |
| A*02:06          | 0,035          | B*13:02     | 0,029          | C*06:02     | 0,045          |
| A*30:01          | 0,027          | B*35:01     | 0,022          | C*04:01     | 0,043          |
| A*31:01          | 0,024          | B*40:02     | 0,017          | C*12:02     | 0,031          |
| A*01:01          | 0,014          | B*44:03     | 0,014          | C*15:02     | 0,026          |
| A*03:01          | 0,014          | B*48:01     | 0,013          | C*12:03     | 0,018          |
| A*32:01          | 0,00618        | B*07:02     | 0,0079         | C*07:01     | 0,01           |
| A*24:07          | 0,00446        | B*35:03     | 0,00787        | C*05:01     | 0,00362        |
| A*68:01          | 0,00401        | B*56:01     | 0,00609        | C*02:02     | 0,00357        |
| A*23:01          | 0,00209        | B*37:01     | 0,00602        | C*08:02     | 0,00121        |
| A*02:05          | 0,00138        | B*35:05     | 0,00542        | C*17:01     | 0,00049        |
| A*24:03          | 0,00138        | B*57:01     | 0,00511        | C*12:04     | 0,00004        |
| A*74:01          | 0,00137        | B*08:01     | 0,00463        | C*15:04     | 0,00004        |
| A*33:01          | 0,00055        | B*27:05     | 0,00346        | <b>SUM:</b> | <b>0,92097</b> |
| A*30:02          | 0,0003         | B*18:01     | 0,00257        |             |                |
| A*66:01          | 0,00025        | B*45:01     | 0,00203        |             |                |
| A*25:01          | 0,00018        | B*81:01     | 0,00115        |             |                |
| A*68:02          | 0,00014        | B*15:17     | 0,00078        |             |                |
| A*34:02          | 0,00002        | B*55:01     | 0,00076        |             |                |
| A*66:02          | 0,00000        | B*35:02     | 0,00072        |             |                |
| <b>SUM:</b>      | <b>0,93131</b> | B*15:03     | 0,0007         |             |                |
|                  |                | B*49:01     | 0,00059        |             |                |
|                  |                | B*35:08     | 0,0005         |             |                |
|                  |                | B*41:01     | 0,00038        |             |                |
|                  |                | B*53:01     | 0,0003         |             |                |
|                  |                | B*14:01     | 0,00023        |             |                |
|                  |                | B*51:06     | 0,00015        |             |                |
|                  |                | B*15:10     | 0,00013        |             |                |
|                  |                | B*42:01     | 0,00007        |             |                |
|                  |                | B*58:02     | 0,00004        |             |                |
|                  |                | B*42:02     | 0,00003        |             |                |
|                  |                | B*35:11     | 0,00002        |             |                |
|                  |                | B*15:20     | 0,00001        |             |                |
|                  |                | <b>SUM:</b> | <b>0,63366</b> |             |                |

| USA NMDP African American |                |             |                |             |                |
|---------------------------|----------------|-------------|----------------|-------------|----------------|
| A                         |                | B           |                | C           |                |
| Allele                    | Frequency      | Allele      | Frequency      | Allele      | Frequency      |
| A*02:01                   | 0,123          | B*53:01     | 0,118          | C*04:01     | 0,204          |
| A*23:01                   | 0,11           | B*07:02     | 0,073          | C*07:01     | 0,117          |
| A*03:01                   | 0,084          | B*35:01     | 0,069          | C*02:02     | 0,089          |
| A*30:01                   | 0,068          | B*15:03     | 0,064          | C*06:02     | 0,087          |
| A*30:02                   | 0,067          | B*42:01     | 0,053          | C*07:02     | 0,071          |
| A*68:02                   | 0,06           | B*45:01     | 0,05           | C*17:01     | 0,068          |
| A*74:01                   | 0,055          | B*44:03     | 0,046          | C*03:04     | 0,057          |
| A*33:03                   | 0,052          | B*58:02     | 0,042          | C*05:01     | 0,034          |
| A*01:01                   | 0,047          | B*08:01     | 0,038          | C*08:02     | 0,034          |
| A*68:01                   | 0,04           | B*58:01     | 0,038          | C*03:02     | 0,018          |
| A*34:02                   | 0,034          | B*15:10     | 0,035          | C*12:03     | 0,015          |
| A*24:02                   | 0,025          | B*18:01     | 0,032          | C*03:03     | 0,013          |
| A*33:01                   | 0,021          | B*49:01     | 0,028          | C*01:02     | 0,00776        |
| A*02:05                   | 0,015          | B*51:01     | 0,022          | C*15:02     | 0,00537        |
| A*32:01                   | 0,015          | B*44:02     | 0,021          | C*12:02     | 0,00115        |
| A*11:01                   | 0,014          | B*81:01     | 0,02           | C*08:01     | 0,00105        |
| A*66:01                   | 0,014          | B*40:01     | 0,013          | C*15:04     | 0,00001        |
| A*31:01                   | 0,01           | B*15:01     | 0,011          | C*12:04     | 0,00000        |
| A*66:02                   | 0,00886        | B*27:05     | 0,00843        | <b>SUM:</b> | <b>0,82234</b> |
| A*01:02                   | 0,00416        | B*14:01     | 0,00792        |             |                |
| A*25:01                   | 0,00344        | B*13:02     | 0,00782        |             |                |
| A*02:06                   | 0,00071        | B*57:01     | 0,00711        |             |                |
| A*24:07                   | 0,00053        | B*37:01     | 0,0055         |             |                |
| A*24:03                   | 0,00041        | B*15:17     | 0,00451        |             |                |
| A*02:03                   | 0,00016        | B*55:01     | 0,00399        |             |                |
| A*02:07                   | 0,00002        | B*40:02     | 0,00334        |             |                |
| <b>SUM:</b>               | <b>0,87229</b> | B*41:01     | 0,00299        |             |                |
|                           |                | B*56:01     | 0,00234        |             |                |
|                           |                | B*35:03     | 0,00198        |             |                |
|                           |                | B*35:02     | 0,00084        |             |                |
|                           |                | B*48:01     | 0,00045        |             |                |
|                           |                | B*35:08     | 0,00039        |             |                |
|                           |                | B*35:05     | 0,00037        |             |                |
|                           |                | B*46:01     | 0,00007        |             |                |
|                           |                | B*15:04     | 0,00004        |             |                |
|                           |                | B*35:11     | 0,00004        |             |                |
|                           |                | B*54:01     | 0,00003        |             |                |
|                           |                | B*51:06     | 0,00002        |             |                |
|                           |                | B*15:20     | 0,00000        |             |                |
|                           |                | <b>SUM:</b> | <b>0,83118</b> |             |                |

| USA NMDP Hispanic |                |             |                |             |                |
|-------------------|----------------|-------------|----------------|-------------|----------------|
| A                 |                | B           |                | C           |                |
| Allele            | Frequency      | Allele      | Frequency      | Allele      | Frequency      |
| A*02:01           | 0,209          | B*35:01     | 0,071          | C*04:01     | 0,176          |
| A*24:02           | 0,132          | B*51:01     | 0,061          | C*07:02     | 0,121          |
| A*03:01           | 0,074          | B*07:02     | 0,058          | C*07:01     | 0,102          |
| A*01:01           | 0,073          | B*44:03     | 0,055          | C*06:02     | 0,061          |
| A*68:01           | 0,048          | B*40:02     | 0,048          | C*03:04     | 0,06           |
| A*11:01           | 0,046          | B*18:01     | 0,041          | C*05:01     | 0,058          |
| A*31:01           | 0,044          | B*44:02     | 0,04           | C*01:02     | 0,054          |
| A*23:01           | 0,037          | B*08:01     | 0,039          | C*08:02     | 0,053          |
| A*30:02           | 0,027          | B*15:01     | 0,027          | C*12:03     | 0,042          |
| A*32:01           | 0,026          | B*49:01     | 0,026          | C*15:02     | 0,039          |
| A*68:02           | 0,025          | B*53:01     | 0,02           | C*02:02     | 0,037          |
| A*33:01           | 0,022          | B*45:01     | 0,017          | C*03:03     | 0,03           |
| A*02:06           | 0,02           | B*27:05     | 0,016          | C*17:01     | 0,02           |
| A*30:01           | 0,02           | B*35:03     | 0,015          | C*08:01     | 0,015          |
| A*02:05           | 0,015          | B*57:01     | 0,015          | C*12:02     | 0,012          |
| A*25:01           | 0,01           | B*40:01     | 0,014          | C*03:02     | 0,00494        |
| A*33:03           | 0,00818        | B*48:01     | 0,014          | C*15:04     | 0,00011        |
| A*74:01           | 0,00727        | B*58:01     | 0,014          | C*12:04     | 0,00004        |
| A*66:01           | 0,00641        | B*13:02     | 0,013          | <b>SUM:</b> | <b>0,88509</b> |
| A*24:03           | 0,00492        | B*15:03     | 0,013          |             |                |
| A*34:02           | 0,00465        | B*35:02     | 0,013          |             |                |
| A*01:02           | 0,00139        | B*41:01     | 0,01           |             |                |
| A*66:02           | 0,00079        | B*55:01     | 0,00906        |             |                |
| A*24:07           | 0,0003         | B*14:01     | 0,00892        |             |                |
| A*02:03           | 0,00016        | B*37:01     | 0,00749        |             |                |
| A*02:07           | 0,00006        | B*15:17     | 0,00677        |             |                |
| <b>SUM:</b>       | <b>0,86213</b> | B*42:01     | 0,00677        |             |                |
|                   |                | B*35:08     | 0,006          |             |                |
|                   |                | B*35:05     | 0,00561        |             |                |
|                   |                | B*15:10     | 0,00551        |             |                |
|                   |                | B*15:04     | 0,00389        |             |                |
|                   |                | B*58:02     | 0,0037         |             |                |
|                   |                | B*56:01     | 0,00344        |             |                |
|                   |                | B*81:01     | 0,00229        |             |                |
|                   |                | B*35:11     | 0,0004         |             |                |
|                   |                | B*46:01     | 0,00023        |             |                |
|                   |                | B*15:20     | 0,00017        |             |                |
|                   |                | B*54:01     | 0,00009        |             |                |
|                   |                | B*51:06     | 0,00004        |             |                |
|                   |                | <b>SUM:</b> | <b>0,71038</b> |             |                |

| USA NMDP Mexican or Chicano |                |             |                |             |                |
|-----------------------------|----------------|-------------|----------------|-------------|----------------|
| A                           |                | B           |                | C           |                |
| Allele                      | Frequency      | Allele      | Frequency      | Allele      | Frequency      |
| A*02:01                     | 0,223          | B*35:01     | 0,08           | C*04:01     | 0,171          |
| A*24:02                     | 0,13           | B*51:01     | 0,058          | C*07:02     | 0,137          |
| A*03:01                     | 0,081          | B*07:02     | 0,057          | C*07:01     | 0,092          |
| A*01:01                     | 0,074          | B*40:02     | 0,057          | C*03:04     | 0,073          |
| A*31:01                     | 0,053          | B*44:03     | 0,047          | C*06:02     | 0,06           |
| A*68:01                     | 0,052          | B*08:01     | 0,042          | C*05:01     | 0,057          |
| A*02:06                     | 0,05           | B*18:01     | 0,041          | C*01:02     | 0,051          |
| A*11:01                     | 0,048          | B*44:02     | 0,041          | C*08:02     | 0,051          |
| A*23:01                     | 0,026          | B*15:01     | 0,031          | C*12:03     | 0,039          |
| A*32:01                     | 0,025          | B*48:01     | 0,025          | C*03:03     | 0,037          |
| A*30:02                     | 0,023          | B*49:01     | 0,023          | C*08:01     | 0,036          |
| A*33:01                     | 0,02           | B*27:05     | 0,022          | C*15:02     | 0,036          |
| A*68:02                     | 0,018          | B*13:02     | 0,014          | C*02:02     | 0,034          |
| A*30:01                     | 0,016          | B*40:01     | 0,014          | C*17:01     | 0,014          |
| A*02:05                     | 0,014          | B*45:01     | 0,014          | C*12:02     | 0,011          |
| A*25:01                     | 0,011          | B*35:02     | 0,013          | C*03:02     | 0,00372        |
| A*33:03                     | 0,00493        | B*35:03     | 0,013          | C*15:04     | 0,00021        |
| A*66:01                     | 0,00492        | B*57:01     | 0,013          | C*12:04     | 0,00006        |
| A*74:01                     | 0,00443        | B*53:01     | 0,012          | <b>SUM:</b> | <b>0,90299</b> |
| A*34:02                     | 0,00254        | B*15:03     | 0,01           |             |                |
| A*24:03                     | 0,00169        | B*41:01     | 0,00992        |             |                |
| A*01:02                     | 0,00124        | B*55:01     | 0,00903        |             |                |
| A*24:07                     | 0,0004         | B*58:01     | 0,00901        |             |                |
| A*66:02                     | 0,00032        | B*14:01     | 0,00874        |             |                |
| A*02:03                     | 0,00012        | B*37:01     | 0,0073         |             |                |
| A*02:07                     | 0,00002        | B*35:08     | 0,00523        |             |                |
| <b>SUM:</b>                 | <b>0,88461</b> | B*15:17     | 0,00454        |             |                |
|                             |                | B*56:01     | 0,0041         |             |                |
|                             |                | B*42:01     | 0,00341        |             |                |
|                             |                | B*58:02     | 0,00244        |             |                |
|                             |                | B*15:10     | 0,00242        |             |                |
|                             |                | B*35:05     | 0,00153        |             |                |
|                             |                | B*81:01     | 0,00126        |             |                |
|                             |                | B*15:04     | 0,00024        |             |                |
|                             |                | B*46:01     | 0,0002         |             |                |
|                             |                | B*35:11     | 0,00009        |             |                |
|                             |                | B*51:06     | 0,00006        |             |                |
|                             |                | B*54:01     | 0,00006        |             |                |
|                             |                | B*15:20     | 0,00001        |             |                |
|                             |                | <b>SUM:</b> | <b>0,69659</b> |             |                |

| USA NMDP South Asian Indian |                |             |                |             |                |
|-----------------------------|----------------|-------------|----------------|-------------|----------------|
| A                           |                | B           |                | C           |                |
| Allele                      | Frequency      | Allele      | Frequency      | Allele      | Frequency      |
| A*01:01                     | 0,155          | B*51:01     | 0,075          | C*06:02     | 0,139          |
| A*11:01                     | 0,14           | B*44:03     | 0,074          | C*04:01     | 0,136          |
| A*24:02                     | 0,136          | B*35:03     | 0,072          | C*07:02     | 0,108          |
| A*33:03                     | 0,099          | B*57:01     | 0,068          | C*15:02     | 0,108          |
| A*68:01                     | 0,068          | B*35:01     | 0,062          | C*07:01     | 0,104          |
| A*03:01                     | 0,064          | B*07:02     | 0,044          | C*12:02     | 0,081          |
| A*02:01                     | 0,049          | B*58:01     | 0,042          | C*12:03     | 0,049          |
| A*32:01                     | 0,039          | B*08:01     | 0,037          | C*03:02     | 0,042          |
| A*31:01                     | 0,033          | B*37:01     | 0,034          | C*01:02     | 0,035          |
| A*02:06                     | 0,018          | B*18:01     | 0,025          | C*08:01     | 0,028          |
| A*30:01                     | 0,017          | B*40:01     | 0,022          | C*03:04     | 0,016          |
| A*02:03                     | 0,011          | B*55:01     | 0,02           | C*03:03     | 0,015          |
| A*24:07                     | 0,011          | B*13:02     | 0,018          | C*02:02     | 0,00931        |
| A*02:05                     | 0,00998        | B*15:01     | 0,016          | C*05:01     | 0,00836        |
| A*23:01                     | 0,00664        | B*15:17     | 0,014          | C*17:01     | 0,00387        |
| A*24:03                     | 0,00599        | B*27:05     | 0,00828        | C*12:04     | 0,00269        |
| A*30:02                     | 0,00243        | B*44:02     | 0,00816        | C*08:02     | 0,00192        |
| A*74:01                     | 0,0015         | B*35:02     | 0,00726        | C*15:04     | 0,00032        |
| A*33:01                     | 0,00124        | B*51:06     | 0,00709        | <b>SUM:</b> | <b>0,88747</b> |
| A*02:07                     | 0,0006         | B*49:01     | 0,00614        |             |                |
| A*66:01                     | 0,00034        | B*56:01     | 0,00608        |             |                |
| A*68:02                     | 0,00028        | B*48:01     | 0,00368        |             |                |
| A*25:01                     | 0,00013        | B*41:01     | 0,00347        |             |                |
| A*34:02                     | 0,00004        | B*40:02     | 0,00296        |             |                |
| A*01:02                     | 0,00001        | B*35:08     | 0,00201        |             |                |
| A*66:02                     | 0,00001        | B*53:01     | 0,00126        |             |                |
| <b>SUM:</b>                 | <b>0,86919</b> | B*46:01     | 0,00102        |             |                |
|                             |                | B*45:01     | 0,00088        |             |                |
|                             |                | B*35:05     | 0,00058        |             |                |
|                             |                | B*54:01     | 0,00027        |             |                |
|                             |                | B*15:03     | 0,00023        |             |                |
|                             |                | B*15:10     | 0,0002         |             |                |
|                             |                | B*14:01     | 0,00019        |             |                |
|                             |                | B*42:01     | 0,00011        |             |                |
|                             |                | B*58:02     | 0,00006        |             |                |
|                             |                | B*15:04     | 0,00005        |             |                |
|                             |                | B*81:01     | 0,00005        |             |                |
|                             |                | B*35:11     | 0,00001        |             |                |
|                             |                | SUM:        | 0,68304        |             |                |
|                             |                | <b>SUM:</b> | <b>0,69659</b> |             |                |

Supplementary Table 6 Frequencies of HLA subtype coverage of the B-LCL cell line panel presented in Supplementary Table 3 in different ethnic groups

Source: [www.allelefrequencies.net](http://www.allelefrequencies.net)



Supplementary Table 7

| ID  | Name   | Human     |            | Mouse     |           | AA difference | Protein identity |
|-----|--------|-----------|------------|-----------|-----------|---------------|------------------|
|     |        | UniProtID | Sequence   | UniProtID | Sequence  |               |                  |
| REF | CD20   | P11836    | SLFLGILSV  | P19437    | SVFLGILSA | 2             | 74.83%           |
| #1  | CD6    | P30203    | WLFFGITGL  | Q61003    | WLFLGIAGL | 2             | 70.29%           |
| #2  | S52A3  | Q9NQ40    | LLFLGVLSV  | Q9D6X5    | LLFLGVLTV | 1             | 75.43%           |
| #3  | ARAID  | Q6UW56    | LMFFGILGA  | Q6PGD0    | LMFFGILGS | 1             | 79.37%           |
| #4  | BTNL8  | Q6UX41    | GLFFGIVGL  | No entry  |           |               |                  |
| #5  | TTMP   | Q5BVD1    | SIFLGVITV  | Q8C5C9    | TIFLCFIV  | 4             | 67.28%           |
| #6  | S36A4  | Q6YBV0    | LVFIGIISV  | Q8CH36    | LVFIGIISV | 0             | 88.20%           |
| #7  | T255A  | Q5JRV8    | GLFLGIITA  | Q8BHW5    | GLFLGIITA | 0             | 95.42%           |
| #8  | SEM7A  | O75326    | SLWLGVLPT  | Q9QUR8    | SFWLGVLPT | 1             | 89.44%           |
| #9  | LETMD1 | Q6P1Q0    | CLFLGIISI  | Q924L1    | CLFVGLISI | 2             | 80.00%           |
| #10 | MSH3   | P20585    | NIFIGIVGV  | P13705    | NLSVGVVGV | 4             | 80.66%           |
| #11 | AP5S1  | Q9NUS5    | VVWLGVLSL  | Q9D742    | VLWLGILSL | 2             | 79.41%           |
| #12 | ABCA2  | Q9BZC7    | NLFIGITAT  | P41234    | NLFIGITAT | 0             | 91.03%           |
| #13 | FETUA  | P02765    | HTFMGVVSL  | P29699    | HAFSPVASV | 5             | 60.87%           |
| #14 | AL3A2  | P51648    | LTFLGIVAA  | P47740    | FVCLVAVAA | 4             | 84.09%           |
| #15 | S35F6  | Q8N357    | SQWLGILAT  | Q8VE96    | SQWLGILIT | 1             | 87.06%           |
| #16 | PAXI1  | Q6ZW49    | QIFFGITAC  | Q6NZQ4    | QIFFGLTAC | 1             | 85.74%           |
| #17 | MRP2   | Q92887    | TCFLGIIST  | Q8VI47    | LCFFGIVST | 3             | 77.58%           |
| #18 | CML1   | Q99788    | VCFLGILGN  | P97468    | VCFLGLLGN | 1             | 80.32%           |
| #19 | O10G3  | Q8NGC4    | YIFLGVLSV  | No entry  |           |               |                  |
| #20 | MARH6  | O60337    | FAWLGVVPL  | Q6ZQ89    | FAWLGVVPL | 0             | 98.02%           |
| #21 | CNR1   | P21554    | MFWIGVTSV  | P47746    | MFWIGVTSV | 0             | 97.25%           |
| #22 | CYAC3  | Q8NB12    | HSWLGITTV  | Q6P1H1    | HSWLGITTV | 0             | 84.71%           |
| #23 | POK18  | Q9QC07    | VSFLGVTTV  | No entry  |           |               |                  |
| #24 | CHAD   | O15335    | GAFLGVTTL  | O55226    | AAFSGVTTL | 2             | 92.74%           |
| #25 | T255B  | Q8WV15    | GSFLGIIGI  | Q5FW56    | PDHWPCCNH | 9             | 61.09%           |
| #26 | O10R2  | Q8NGX6    | YFFLGILST  | No entry  |           |               |                  |
| #27 | P4HA2  | O15460    | MAWFGVLSC  | Q60716    | MSWFGVLSW | 2             | 91.78%           |
| #28 | SEM4F  | O95754    | GFFLGILAA  | Q9Z123    | GFFLGVLA  | 1             | 91.17%           |
| #29 | GPR85  | P60893    | IAFLGVLSC  | P60894    | IAFLGVLSC | 0             | 100.00%          |
| #30 | S15A3  | Q8IY34    | AAFFGV TAN | Q8BPX9    | AAFFGVTSN | 1             | 81.14%           |

Supplementary Table 7 Comparison between human and corresponding mouse sequences of investigated potential off-target epitopes of A23

Peptides in light brown induced response by A23-TCR-Ts only at high concentrations (n=3). Peptides in medium brown induced titratable responses by A23-TCR-Ts but processing of the epitope could not be confirmed (n=5). Peptides shown in dark brown were recognized by A23-TCR-Ts when transfected as minigenes in target cells (n=3). Blue, Amino acid sequences are identical in human and mouse. Red, Amino acids that differ between human and mouse.

## SUPPLEMENTARY METHODS

### Immunopeptidomics profiling of HLA mono allelic B721.221 cells

HLA class I-deficient B721.221 cells (IHW00001, FRED HUTCH Research Cell bank) were retrovirally transduced to express single HLA alleles<sup>1</sup> (HLA-A\*01:01, HLA-A\*02:01, HLA-A\*03:01, HLA-A\*11:01, HLA-A\*24:02, HLA-B\*07:02, HLA-B\*08:01, HLA-B\*40:01, HLA-B\*44:02) and sorted (SH800 cell sorter, Sony) after staining with a PE anti-human HLA-A, B, C antibody (W632, Nordic Biosite AS, 311406). The cells were expanded to  $100 \times 10^6$  and then lysed in 1 mL of lysis buffer (PBS containing 1% lauryl maltoside, 1 mM EDTA, 1 mM PMSF and 1:200 Sigma protease inhibitor) for 1 h on ice. HLA peptide complexes were purified by immunoprecipitation<sup>2</sup>. Briefly, the HLA peptide complexes were captured on to beads coated with pan HLA class I antibody, and the beads were then washed with 3mL each of 0.1 M Tris-HCl / 150 mM NaCl, 0.1 M Tris-HCl / 400 mM NaCl, again with 0.1 M Tris-HCl / 150 mM NaCl, and finally 0.1 M Tris-HCl. All peptide elutions were desalted with Discovery DSC-18 SPE column, vacuum concentrated and dissolved in 25  $\mu$ L of 3% acetonitrile containing 0.1% TFA.

### Cell lysis and protein digestion

Cells were lysed in lysis buffer (150mM NaCl, 30mM HEPES, pH 7.4, 1mM EDTA, 2mM MgCl<sub>2</sub>, 1% Lauryl maltoside (Merck; cat.no. 850520P-5G), protease inhibitor cocktail (Sigma; cat. no. P8340-5ML), 1mM TCEP, 1mM PMSF, 1mM NaF, 1mM Na<sub>3</sub>VO<sub>4</sub>, and 250 units of benzonase (Semba Biosciences; cat. no. R1006E)) for 1h on ice and centrifuged at 14,000g for 10 min. Protein (100 $\mu$ g) from each cell type was then denatured and reduced with 0.3% SDS and 10 mM DTT (Merck; cat.no. D0632-5G) at 95°C for 10 minutes and at RT in 35 minutes. Each sample was then alkylated with 30 mM Acrylamide (Merck; cat.no. A9099-25G) at RT in the dark for 45 minutes and quenched with 20mM DTT for 30 minutes at RT. 30  $\mu$ L of Amine beads (Resyn Biosciences, cat.no. MR-AMN005) was washed 3 times with 70% acetonitrile (Merck; cat.no. 34851-1L) before adding to each protein sample. Acetonitrile was then added to each sample up to 70% final concentration. The beads were incubated for 1 hour at RT and washed with 95% acetonitrile, 80% ethanol, twice with deionized water, and resuspended in

100 µl of ammonium carbonate buffer containing 0.1% of proteasemax (Promega; cat.no. V2071).

Trypsin (1.5 µg) was added to each sample and incubated at 1200 rpm overnight at 37°C. 1% TFA final concentration was added to each sample to stop digestion and the peptides were purified similarly to the immunopeptidomics samples.

### **Mass spectrometry**

The immunopeptidomics samples (5 µL) was analysed using an Ultimate 3000 nano-UHPLC system (Dionex, Sunnyvale, CA, USA) connected to a Q Exactive mass spectrometer (ThermoElectron, Bremen, Germany) equipped with a nano electrospray ion source<sup>2</sup>. A flow rate of 300 nL/min was employed with a solvent gradient of 3-35% B in 100 min, to 50% B in 13 min and then to 80% B in 2 min. The samples were also analysed using a longer solvent gradient of 3-35% B in 100 min, to 50% B in 13 min and then to 80% B in 2 min. Solvent A was 0.1% formic acid and solvent B was 0.1% formic acid / 90% acetonitrile. The mass spectrometer was operated in the data-dependent mode to automatically switch between MS and MS/MS acquisition. The method used allowed sequential isolation of up to the twelve most intense ions, depending on signal intensity (intensity threshold 1e5), for fragmentation using higher-energy collision induced dissociation (HCD) at a resolution  $R = 17,500$  with NCE 27. The raw data was then analysed with PEAKS software (Bioinformatics Solutions Inc.). The tandem mass spectra were matched against the Uniprot Homo sapiens database. Precursor mass tolerance was set to 10 ppm, methionine oxidation was considered as variable modification, enzyme specificity was set to none and a product ion tolerance of 0.05 Da was used. Digested peptides were analyzed similarly to the immunopeptidomics samples, except for the total gradient of 90 minutes and the target ions already selected for MS/MS were dynamically excluded for 30s. The raw data was then analyzed with Fragpipe v19.1 and MSfragger v3.7<sup>3</sup> using the default LFQ-MBR workflow. Parameters were set as follows: Alkylation at Cysteine as fixed modification; protein N-acetylation and methionine oxidation as variable modifications, and MBR was disabled. Trypsin without proline restriction enzyme

option was used, with two allowed miscleavages. The allowed false discovery rate was 0.01 (1%) for peptide and protein identification.

### **Quantitative PCR analysis**

Total RNA was extracted from cells using the RNeasy Plus mini kit (Quiagen) and the RNA concentration was determined with the Qubit RNA BR Assay Kit (Thermo Fisher Scientific).

Quantitative PCR (qPCR) was carried out using the KiCqStart One-Step Probe RT-qPCR ReadyMix kit (Sigma-Aldrich). The following TaqMan qPCR probes were used GAPDH Hs02758991\_g1 /vic, B2M Hs00187842\_m1, CD20 Hs00544819\_m1, TTMP Hs01070716\_m1, T255A Hs01075731\_m1, LTMD1 Hs00374912\_m1, NYESO-1 Hs00265824\_m1, Ki67 Hs01032443\_m1, FGRL1 Hs00222484\_m1 (Thermo Fisher Scientific). 2<sup>-ΔΔCt</sup> method was employed for normalization and GAPDH or β<sub>2</sub> microglobulin were used as reference genes (Fig. S5 A, B).

### **Retroviral gene transfer**

Buffy coats from healthy blood donors were acquired from Oslo University Hospital's blood bank and PBMCs (peripheral blood mononuclear cells) were isolated using density gradient centrifugation. Fresh or cryopreserved PBMCs were seeded out at 1.3 x 10<sup>6</sup> cells/ml concentration on CD3 (OKT3, eBioscience, 16-0037-85) and CD28 (CD28.6, eBioscience, 16-0288-85) antibody coated plates and activated for 72 h. PBMCs were cultured in T-cell medium (TCM, CellGenix GMP DC Medium (CellGenix) supplemented with IL-7 and IL-15 (5 ng/ml each, PeproTech), 5% Normal Human Serum (Trina bioreactives) and 1% Penicillin/streptomycin). Retroviral supernatant was produced by plating 5 x 10<sup>6</sup> Phoenix-AMPHO retrovirus producer cells on 10 cm petri dishes (Day 1) for 24 hours and then transfecting them with 2.6 μg γ-retroviral vector DNA encoding A23 and 1G4 TCR sequences using XtremeGENE 9 DNA Transfection reagent (Roche Diagnostics) according to the manufacturer's instructions (Day 2). After 24 hours, the medium was refreshed and cells were placed to 32 °C for optimal virus production (Day 3). Virus supernatants were collected after 24 and 48 hours (Days 4 and

5). Activated PBMCs were collected, re-suspended in TCM at  $0.5 \times 10^6$  cells/ml concentration, mixed with equal volume of retroviral supernatant, placed in non-tissue culture treated 6-well plates pre-coated with Retronectin (Takara) and spinoculated at 900 g for 60 min at 32 °C (Day 4 and 5).

Transduction efficacy was determined on Day 8-10 using anti-mouse TCR $\beta$  chain antibody (PE, H57-597, BD Biosciences). Cells were cryopreserved on day 12-14. Before functional experiments, cells were rested for 48 h in TCM containing low concentration of cytokines (0.5 ng/ml of IL-7 and IL-15).

Retroviral supernatants encoding full-length HLA alleles were produced as described above and used to transduce cell lines.

For murine T cell transduction, Ecotropic retroviruses encoding the A23 and DMF5 TCRs were obtained after transient transfection of Plat-E cells with 18  $\mu$ g retroviral vector plasmid by calcium phosphate precipitation. 48 h after transfection, 3 ml of virus supernatant were harvested, filtrated and used for transduction. Spleen cells were isolated from HHD mice and erythrocytes were lysed by ammonium chloride treatment. Cells were incubated in splenocyte medium (SM, RPMI 1640, 10% FCS, 100 IU/ml penicillin-streptomycin, 1 mM sodium pyruvate, 1x non-essential amino acids, 50  $\mu$ M 2-mercaptoethanol) supplemented with 1  $\mu$ g/ml anti-mouse CD3, 0.1  $\mu$ g/ml anti-mouse CD28 antibodies (both BioLegend, 145-2C11) and 10 IU/ml human IL-2 (Proleukin S) at a concentration of  $2 \times 10^6$ /ml. On the following day,  $1.5 \times 10^6$  cells were transduced by spinoculation in 24-well non-tissue culture-treated plates pre-coated with 12.5  $\mu$ g/ml Retronectin (TaKaRa) and virus particles (3200 x g, 90 min, 4 °C) in 1 ml SM supplemented with 10 IU/ml IL-2 and  $4 \times 10^5$  mouse T-Activator beads (Thermo Fisher Scientific). A second transduction was performed on the following day by spinoculation with 1 ml virus supernatant (+ 10 IU/ml IL-2). T cells were expanded in SM (+ 50 ng/ml IL-15 (Miltenyi Biotech) for 3 (ATT) or 10 days (co-cultures), respectively.

#### **Protein detection by Western blot**

$10^6$  cells were lysed in RIPA buffer, 4x LDS (ThermoFisher) and 50mM DTT was then added to cleared lysate. Samples were loaded onto a NuPAGE 4-12% Bis-Tris gel (Invitrogen) and transferred to iBlot<sup>®</sup>2

PVDF MiniStacs (Invitrogen). 5%BSA/TBST was as blocking buffer, with NY-ESO-1 monoclonal ab, clone E978 (Invitrogen) used as primary antibody at 1:1000. Polyclonal Rabbit anti-mouse immunoglobulin HRP (Dako) was added as secondary antibody at 1:20,000.  $\beta$ -actin HRP antibody, clone 7D2C10 (Proteintech) at 1:10,000 was used as a loading control. Proteins were visualized using Super Signal™ West Dura Extended Duration Substrate (Thermo Scientific) and iBright 1500 (Invitrogen).

1. Strønen, E. *et al.* Targeting of cancer neoantigens with donor-derived T cell receptor repertoires. *Science (80-. )*. **352**, 1337–1341 (2016).
2. Ali, M. *et al.* T cells targeted to TdT kill leukemic lymphoblasts while sparing normal lymphocytes. *Nat. Biotechnol.* **40**, 488–498 (2022).
3. Kong, A. T., Leprevost, F. V., Avtonomov, D. M., Mellacheruvu, D. & Nesvizhskii, A. I. msFragger: ultrafast and comprehensive peptide identification in mass spectrometry-based proteomics. **14**, 513 (2017).
